# Supplementary material
Source: PubMed Central journal article supplement (PMC4601532)
Supplement: NIHMS65326-supplement-SI.pdf [file NIHMS65326-supplement-SI.pdf]

## **Supplementary Materials**

Figs. S1, S2, S3, S4, S5, S6, S7

Tables S1-6

References (34-45)

Movie S1

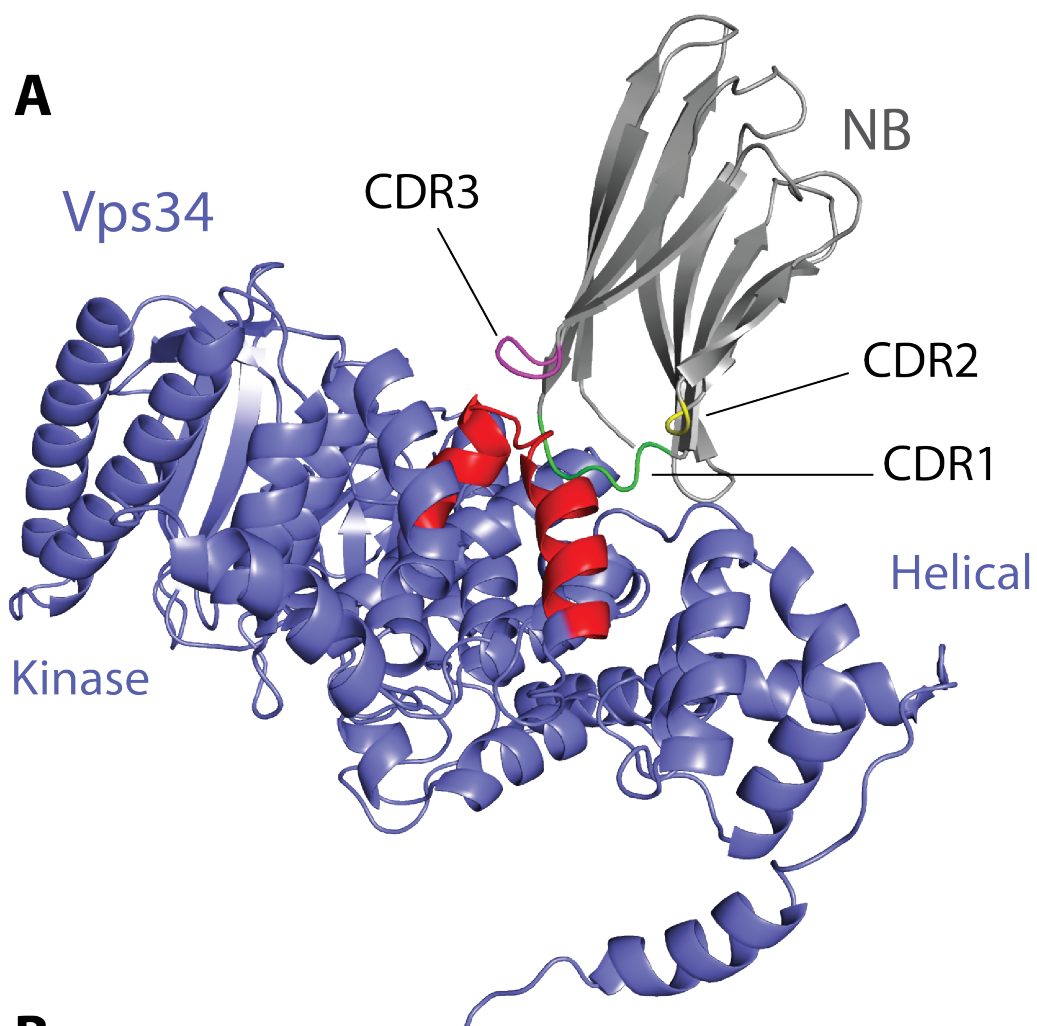

**B**

**Nanobody 8780**

QVQLQESGGGLVQPGGSLRLSCAPSGPFSFNNSMGWYRQAPGKQRELVAVM  
 TIDGRTNYQDSVKGRFTISRDIYKNTAYLQMNNLKPDDTAVYICNAETRGFM  
 HWGQGTQVTVSSHSHHHHH

**Fig. S1.** The Vps34-recognizing nanobody. **(A)** Nanobody enabling complex II crystallization binds to the helical domain of Vps34. The interaction is mainly mediated by the CDR1 (green) and CDR3 (magenta) with no significant contribution from CDR2 (yellow). The epitope on Vps34 (red) is consistent with the peptide identified by HDX-MS (Table S4). No other interaction is observed with the rest of the complex. The nanobody has limited additional contacts with other molecules in the crystal. It is possible that these additional contacts facilitated crystallization. **(B)** The sequence of Nanobody 8780 with CDRs highlighted.

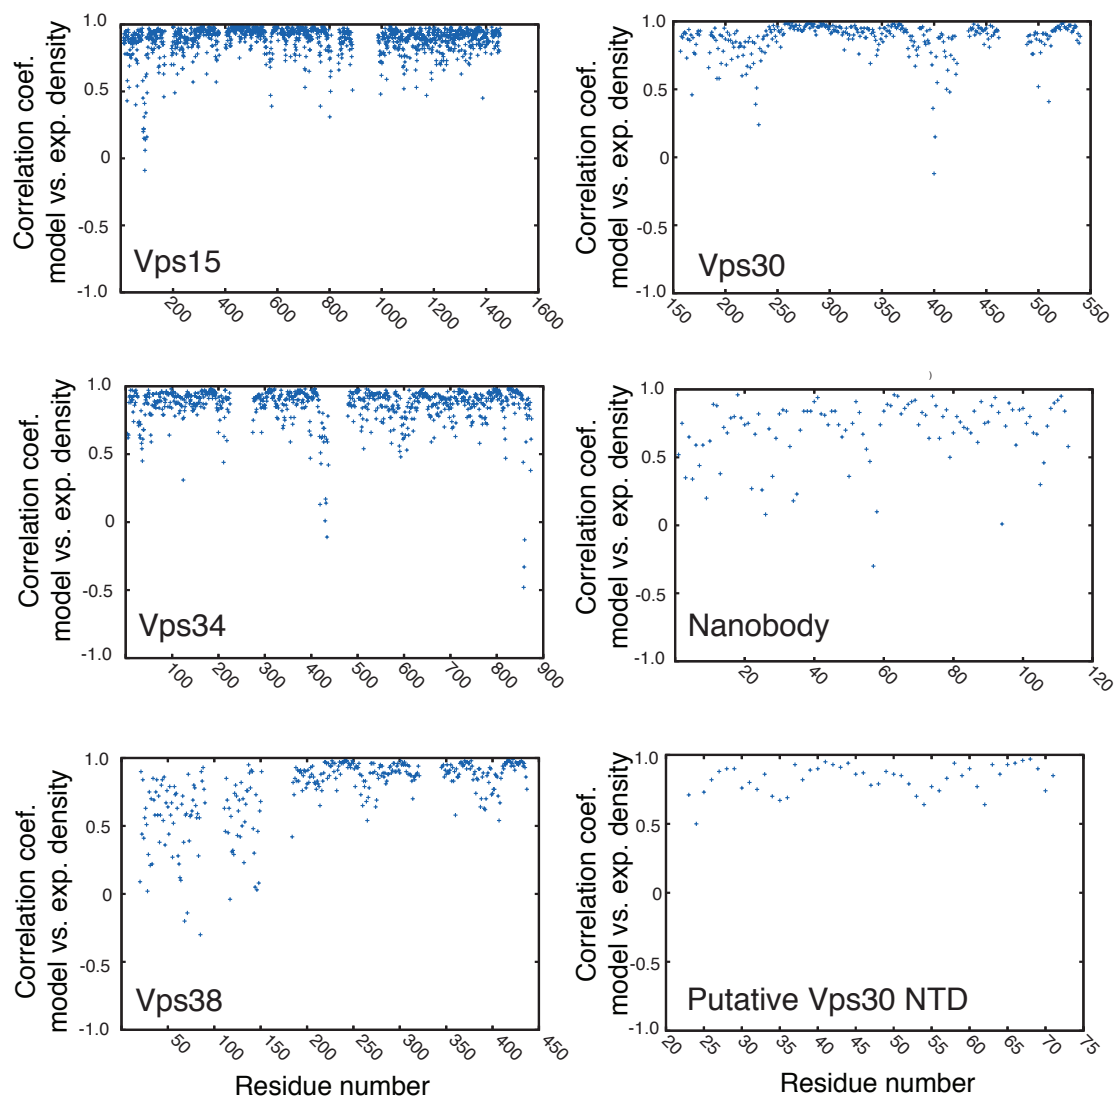

**Fig. S2A.** Real-space correlation of the model electron density with the experimental (MIRAS) electron density map after modification with SOLOMON.

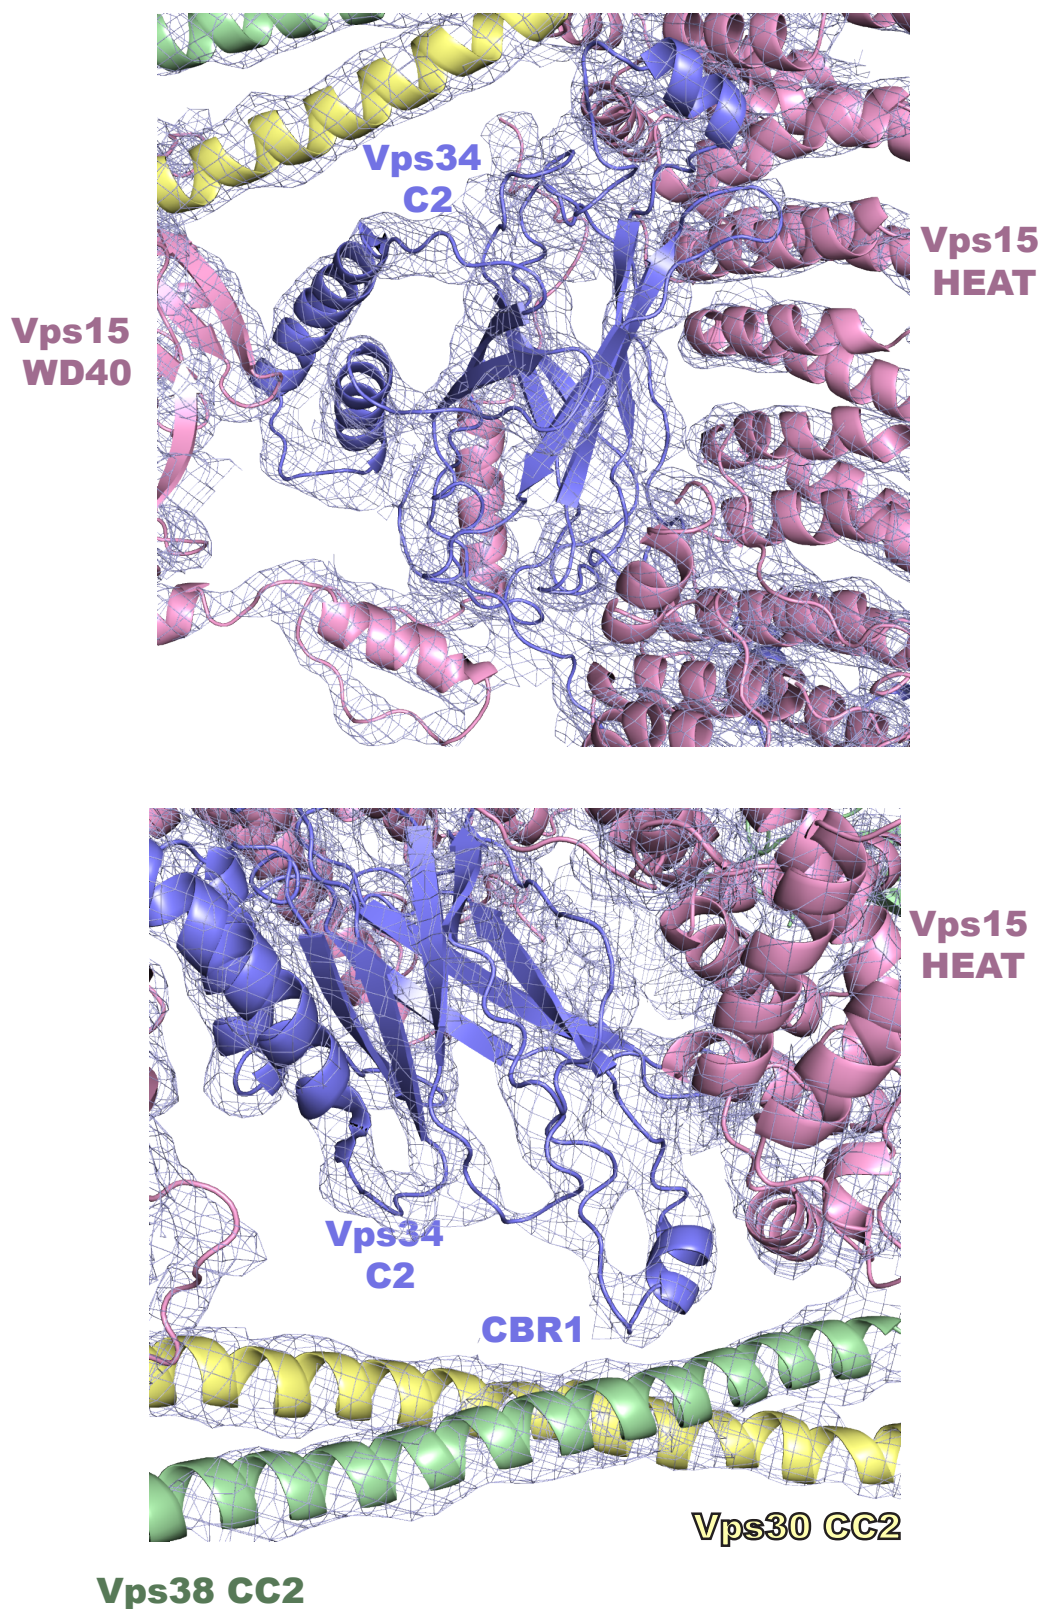

**Fig. S2B.** The experimental (MIRAS) electron density map after modification with SOLOMON. The map is displayed at a  $1.1\sigma$  contour level. The Vps34 C2 and its interfaces are shown.

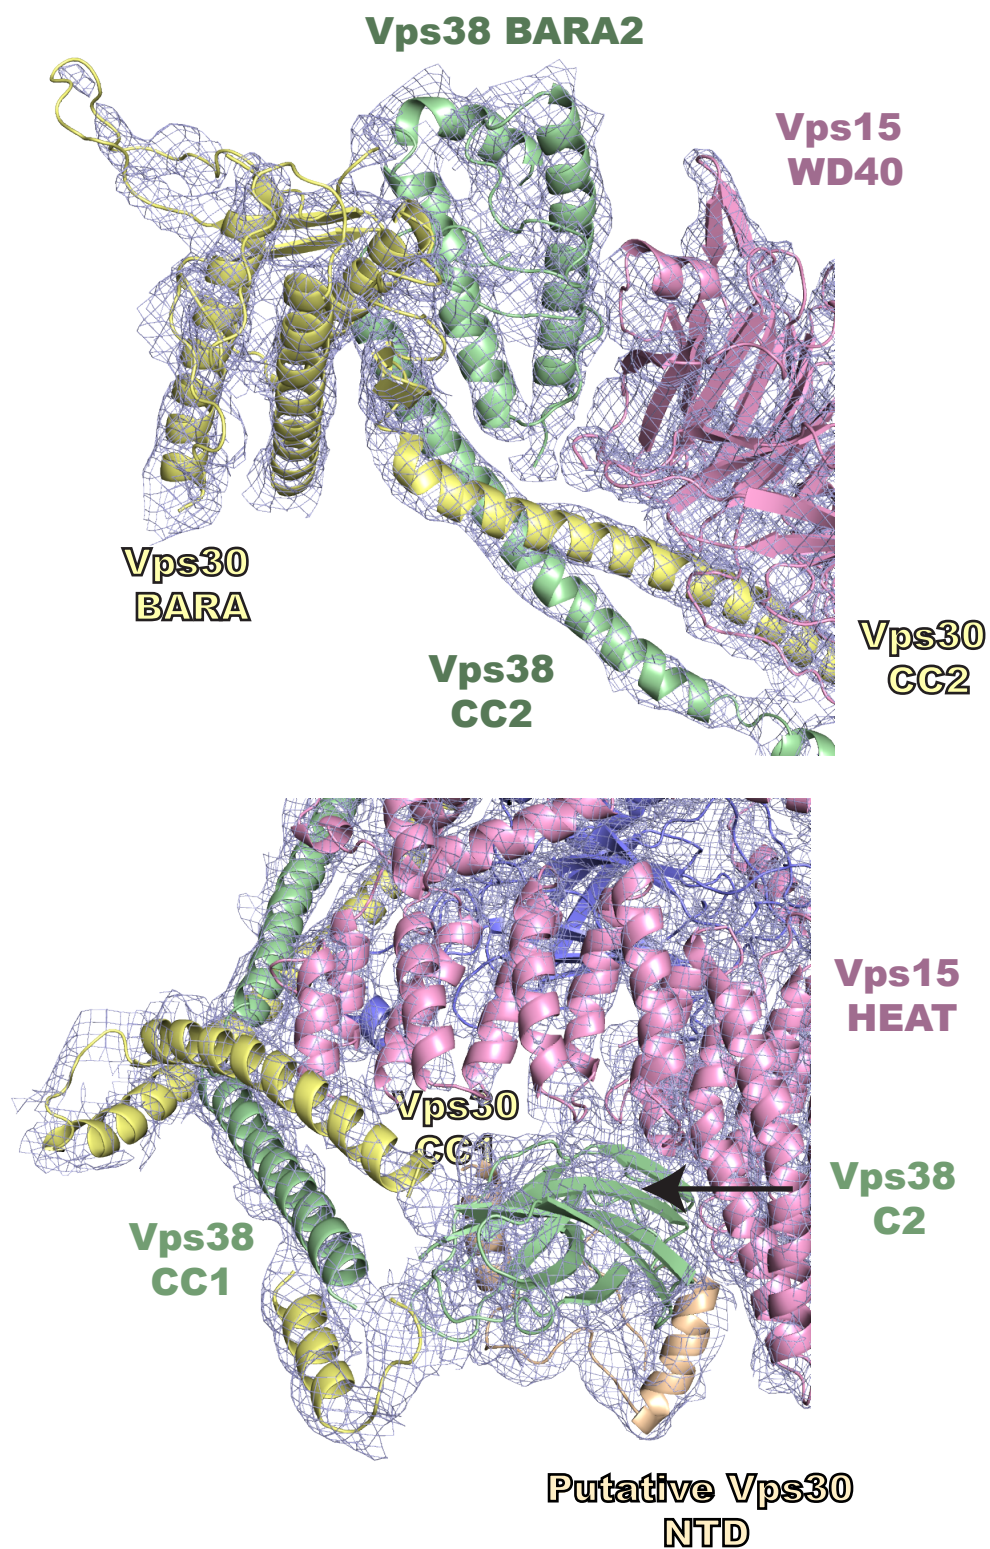

**Fig. S2C.** The experimental (MIRAS) electron density map after modification with SOLOMON. The map is displayed at a  $1.1\sigma$  contour level. The Vps38 C2 and the CC1 domains are shown.

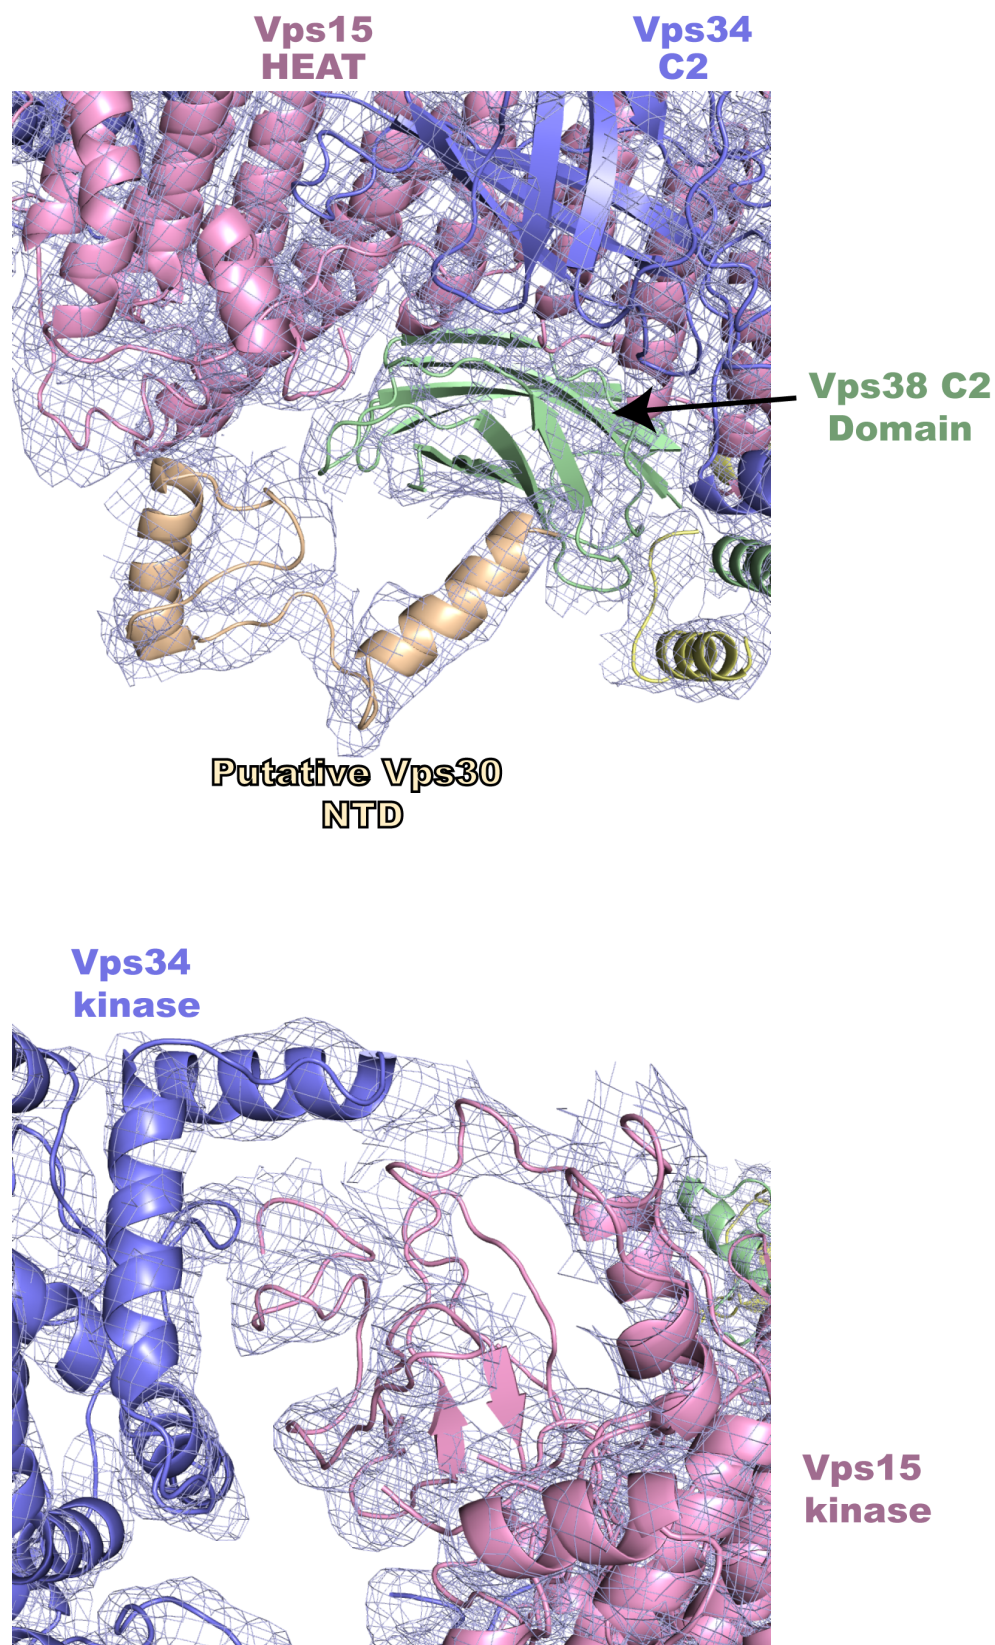

**Fig. S2D.** The experimental (MIRAS) electron density map after modification with SOLOMON. The map is displayed at a  $1.1\sigma$  contour level. The putative Vps30 NTD (upper) and the Vps15 kinase/Vps34 kinase domain interface (lower) are shown.

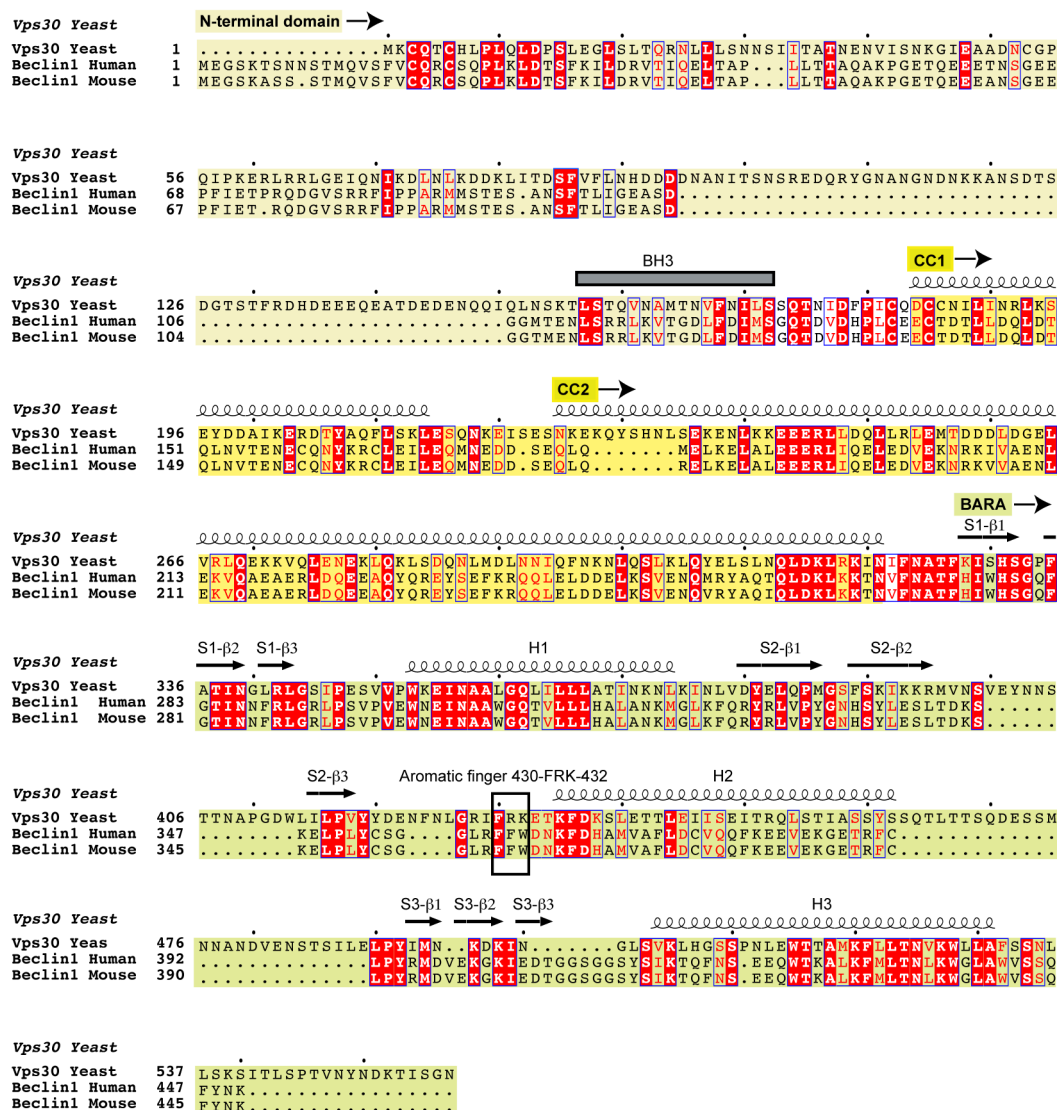

**Fig. S3 (A-D).** Structure-based sequence alignments for Vps15, Vps34, Vps30 and Vps38. The sequence is shaded with different colours for each domain. Secondary structure elements are assigned based on complex II structure. Completely conserved regions among the species are coloured bright red and predominately conserved regions are enclosed in blue boxes.

**(A)** Structure-based sequence alignment of *S. cerevisiae*, *H. sapiens* and *M. musculus* Vps30. Secondary structure prediction is shown for BH3 helix, that cannot be confidently assigned from complex II structure. Residues 430-FRK-432, involved in membrane binding in yeast complex II, align to the previously described “aromatic finger” in Beclin 1 (359-FFW-361). The previous suggestion that the “aromatic finger” is not conserved in yeast was based on the observation that no phenotype arose from mutating residues 418-VYY-420 in yeast Vps30 that were assumed (before the yeast structure was available) to correspond to the human “aromatic finger” (34).

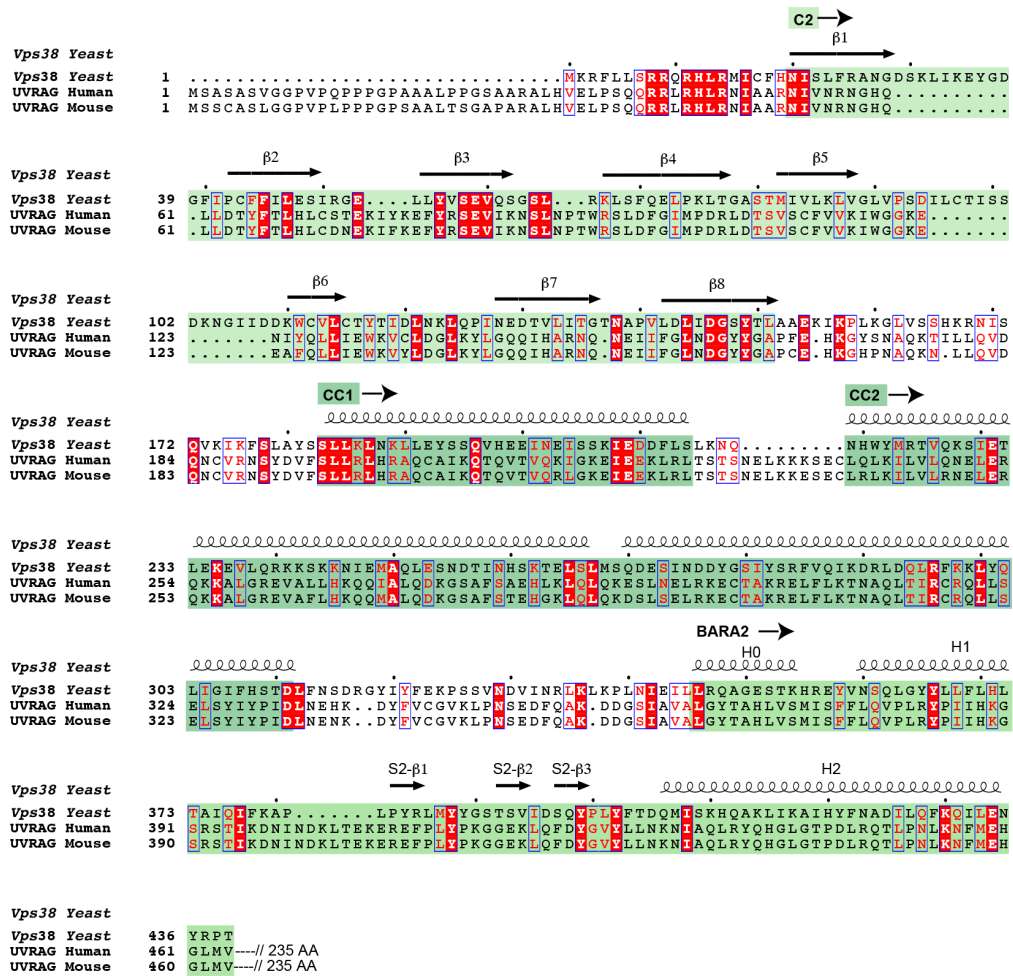

**Fig. S3B.** Structure-based sequence alignment of *S. cerevisiae*, *H. sapiens* and *M. musculus* Vps38. The sequence register for the strands of the C2 domain is less clear due to weak density, and our interpretation is shown above the sequence.



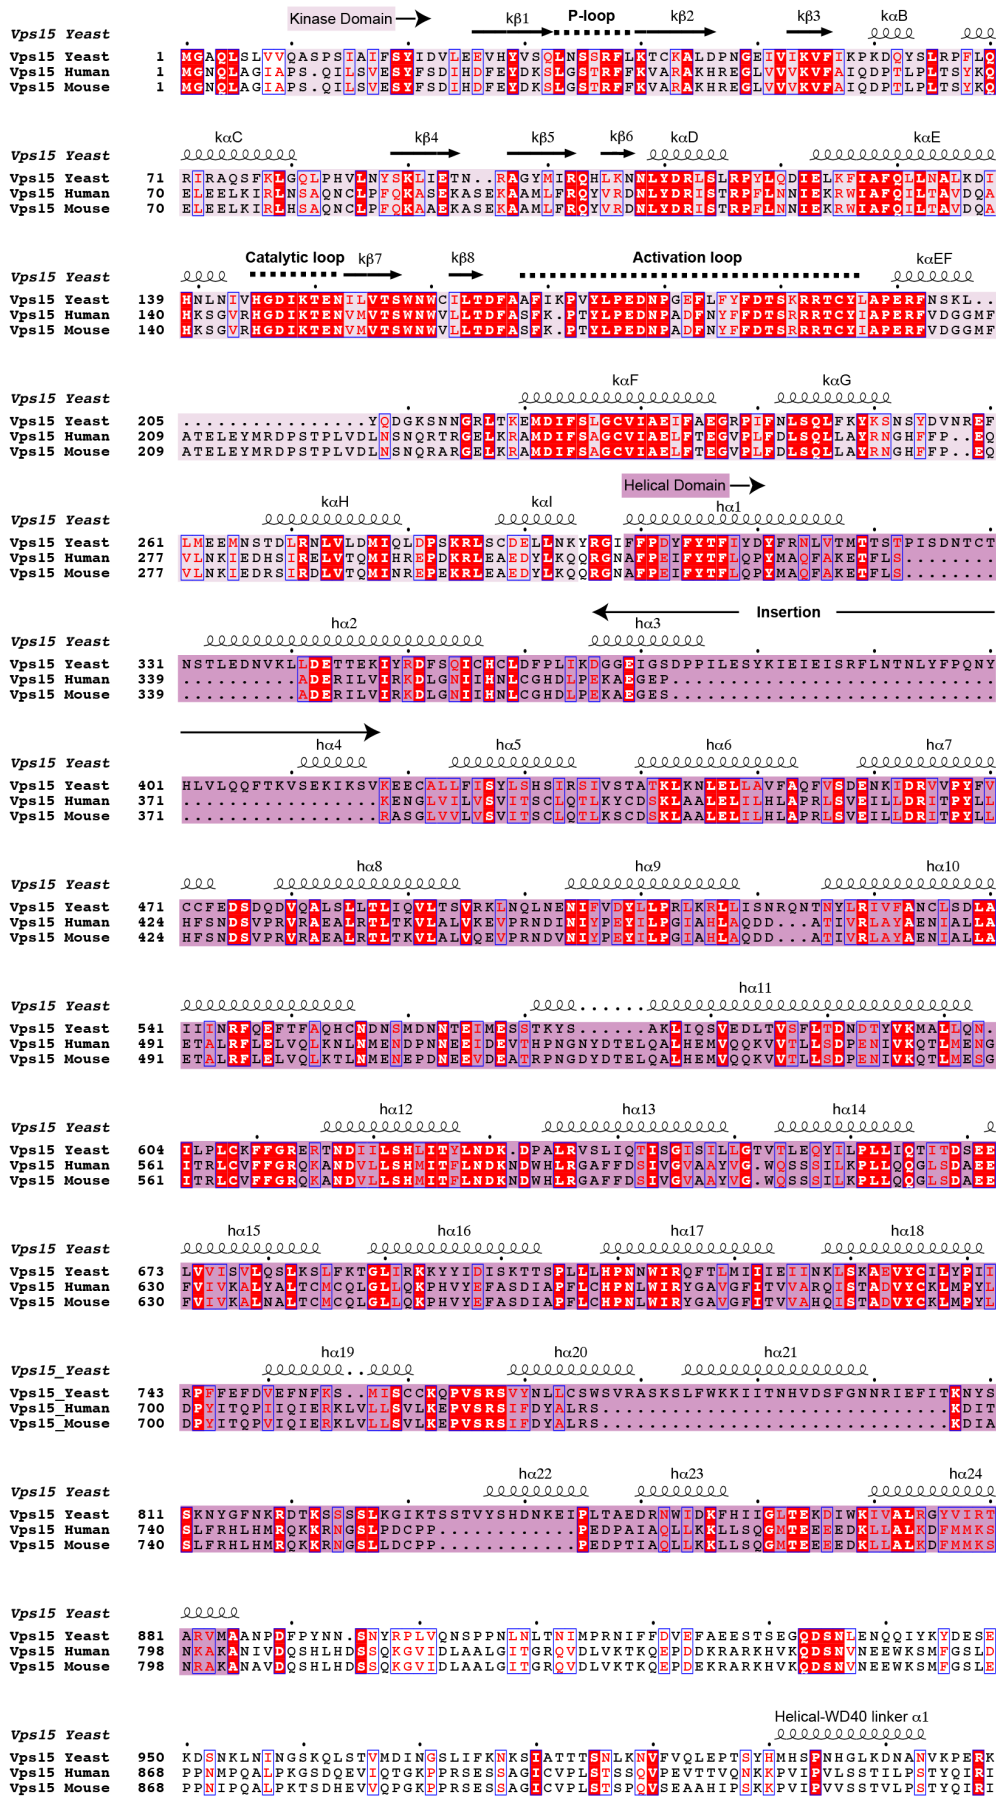

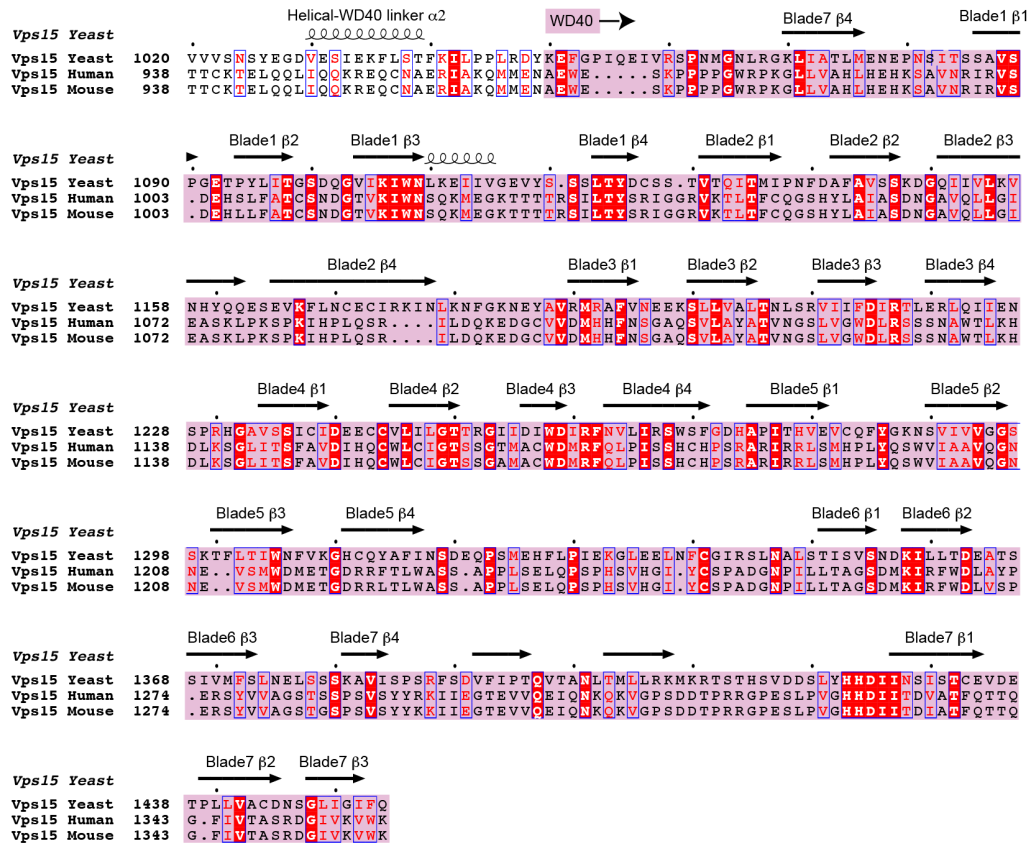

**Fig. S3C.** Structure-based sequence alignment of *S. cerevisiae*, *H. sapiens* and *M. musculus* Vps15.

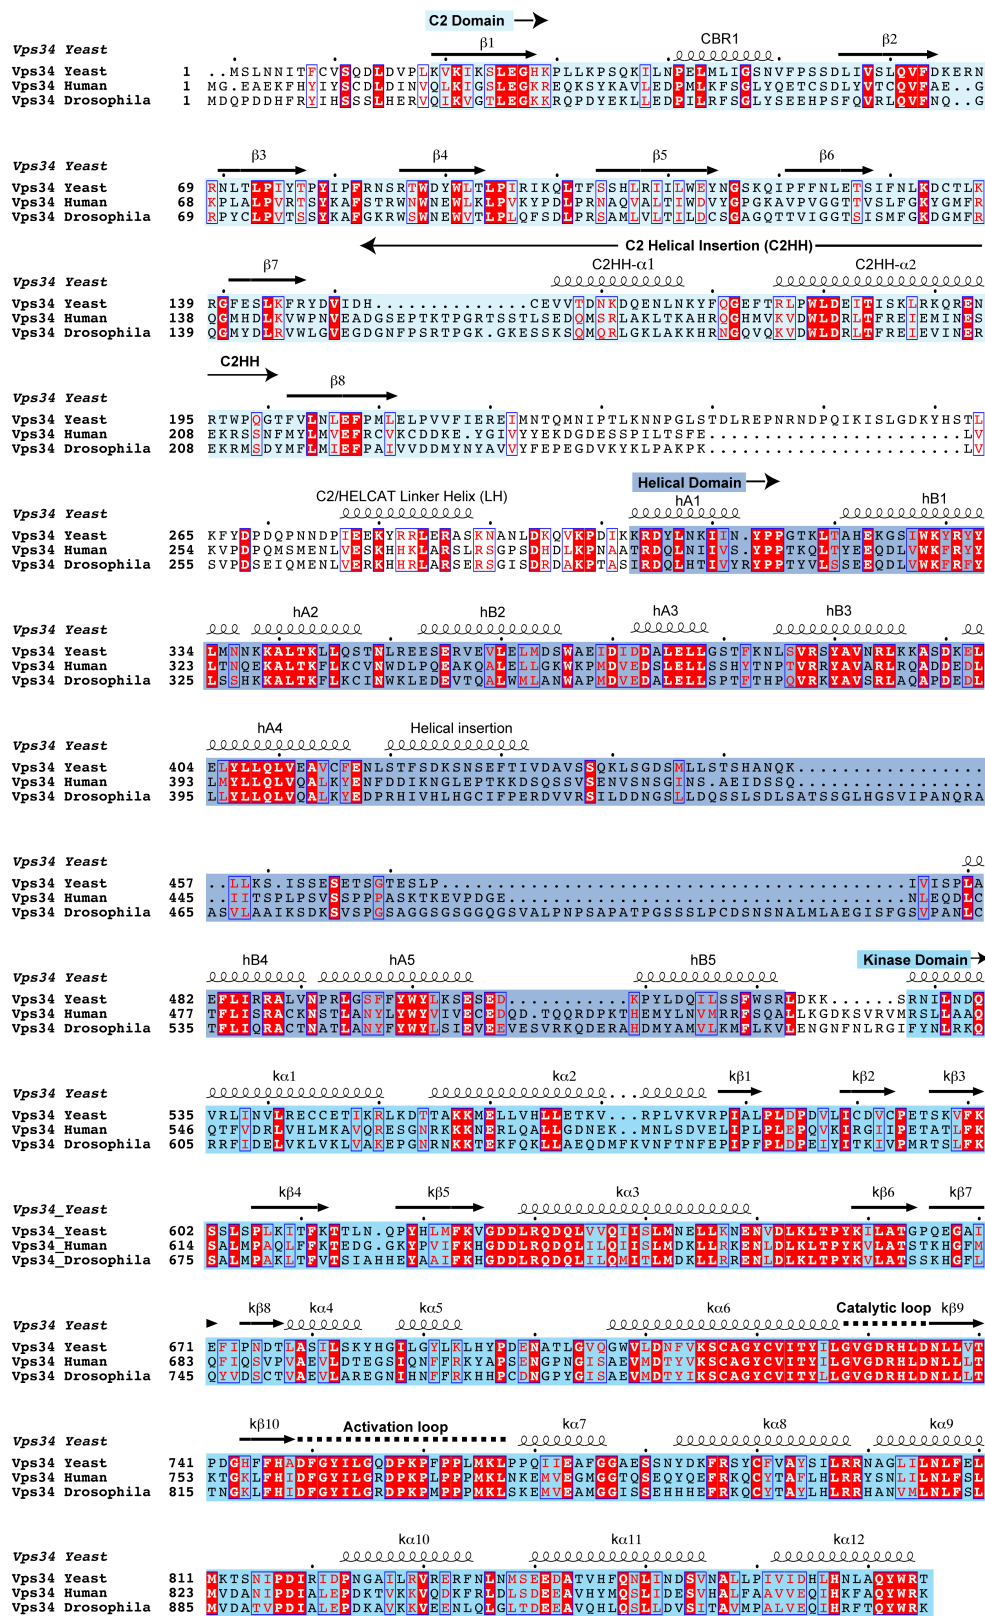

**Fig. S3D.** Structure-based sequence alignment of *S. cerevisiae*, *H. sapiens* and *D. melanogaster* Vps34.

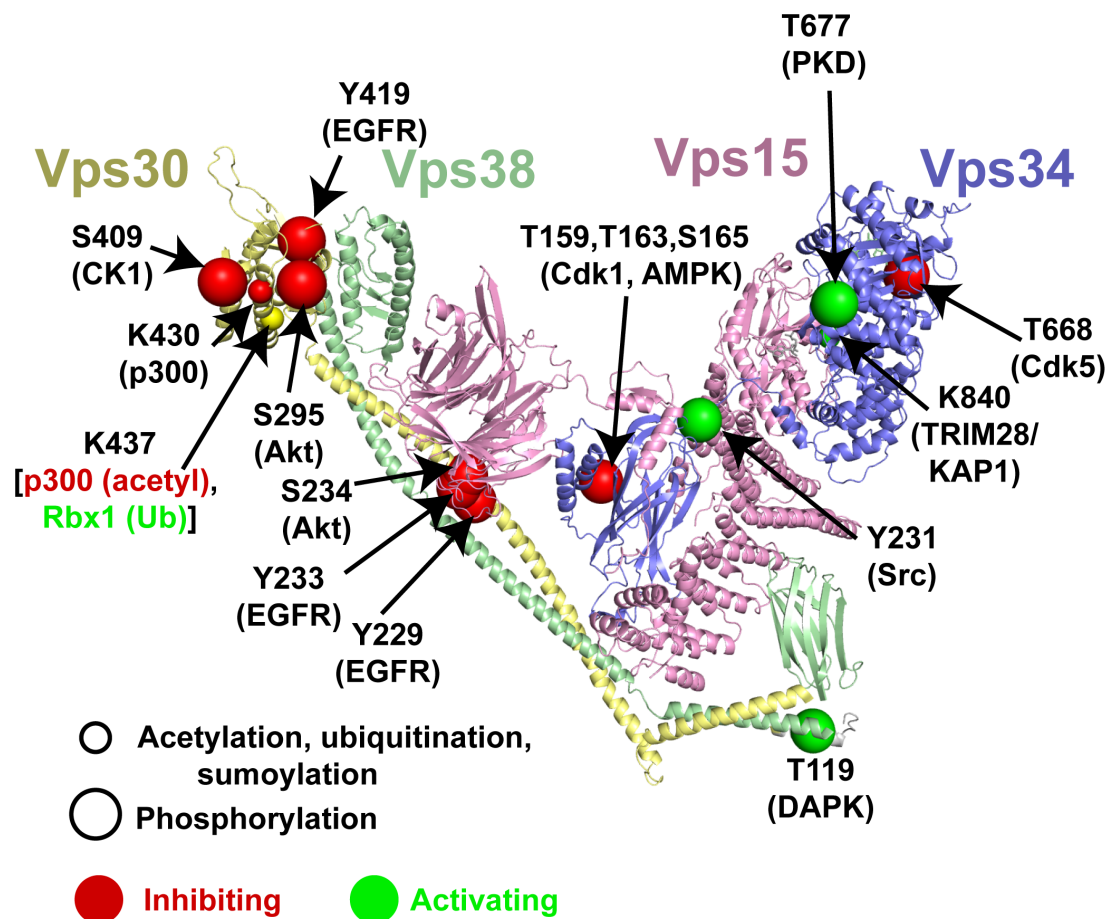

### Post translational modification sites of complex I or II (human numbering)

**Fig. S4A.** Sites of post-translational modifications (PTMs) of complex II subunits mapped onto the structure of yeast complex II. In almost all cases, the residue type is not conserved in yeast, however, the structures of yeast and human complex II are likely to be closely related, and the illustration portrays where the PTM would be located in the human complex. Details of the sites are listed in fig. S4B.

| Target subunit  | Modifying enzyme                                      | Site of PTM (human numbering) | Effect of PTM                                                                                                                                | Region of structure                                          | Reference |
|-----------------|-------------------------------------------------------|-------------------------------|----------------------------------------------------------------------------------------------------------------------------------------------|--------------------------------------------------------------|-----------|
| <b>Beclin 1</b> | DAPK (death-associated protein kinase 1) (S/T kinase) | T119                          | Stimulates autophagy by dissociating Beclin 1 from its inhibitors Bcl-2/ Bcl-XL                                                              | BH3 region of Beclin 1                                       | (53)      |
| <b>Beclin 1</b> | p38 Map kinase                                        | S90                           | Stimulates autophagy                                                                                                                         | NTD of Beclin 1                                              | (54)      |
| <b>Beclin 1</b> | EGFR (Tyr kinase)                                     | Y229,Y23, Y352                | Inhibits autophagy. Promotes formation of homodimers unable to bind Vps34                                                                    | Hinge of CC2 in contact with Vps15 WD40                      | (55)      |
| <b>Beclin 1</b> | Ulk1, Ulk2 (S/T kinase)                               | S15                           | Induces autophagy                                                                                                                            | NTD of Beclin 1                                              | (56)      |
| <b>Beclin 1</b> | AMPK (S/T kinase)                                     | S93, S96                      | Induces Atg14L complex and activates autophagy                                                                                               | NTD of Beclin 1                                              | (31)      |
| <b>Beclin 1</b> | P300 (acetyl-transferase)                             | K430, K437                    | Inhibits autophagosome maturation and endocytic trafficking by promoting the recruitment of Rubicon                                          | BARA domain of Beclin 1                                      | (57)      |
| <b>Beclin 1</b> | CK1 (S/T kinase)                                      | S409                          | Required for the subsequent p300 binding and Beclin 1 acetylation                                                                            | BARA domain of Beclin 1                                      | (57)      |
| <b>Beclin 1</b> | Akt (S/T kinase)                                      | S234, S295                    | Suppresses autophagy                                                                                                                         | Hinge of CC2, Bara domain of Beclin 1                        | (58)      |
| <b>Beclin 1</b> | Traf6 E3 ligase (K63 chains)                          | K117                          | Induces autophagy                                                                                                                            | NTD of Beclin 1                                              | (59)      |
| <b>Beclin 1</b> | Ambra-1-DDB1-Cul4-Rbx1 E3 ligase (k63 chains)         | K437                          | Induces autophagy                                                                                                                            | BARA domain of Beclin 1                                      | (60)      |
| <b>UVRAG</b>    | mTOR (S/T kinase)                                     | S550, S571                    | Loss of these phosphorylation sites reduces VPS34 lipid kinase activity and results in an increase in number and length of lysosomal tubules | Part of C-terminal extension in UVRAG (No Vps38 counterpart) | (10)      |
| <b>Vps34</b>    | PKD (S/T kinase)                                      | T677                          | Stimulates autophagy                                                                                                                         | N-lobe of Vps34 kinase domain                                | (61)      |
| <b>Vps34</b>    | AMPK (S/T kinase)                                     | T163, S165                    | Inhibits non-autophagic complex (i.e., without Atg14L)                                                                                       | Helical hairpin insertion in C2 domain                       | (31, 62)  |
| <b>Vps34</b>    | Src                                                   | Y231                          | Insulin-mediated                                                                                                                             | C2-Helical linker                                            | (63)      |

|              |                   |      |                                        |                                        |      |
|--------------|-------------------|------|----------------------------------------|----------------------------------------|------|
| <b>Vps34</b> | (Tyr kinase)      |      | activation of S6 kinase 1              |                                        |      |
|              | Cdk1 (S/T kinase) | T159 | Inhibits its interaction with Beclin 1 | Helical hairpin insertion in C2 domain | (32) |
| <b>Vps34</b> | Cdk5              | T668 | Eliminates Vps34 activity              | N-lobe of Vps34 kinase domain          | (32) |
| <b>Vps34</b> | TRIM28/KAP1       | K840 | Induces complex assembly               | C-lobe of Vps34 kinase domain          | (27) |

**Fig. S4B.** Post-translational modifications reported for the complex II subunits. Numbering of the sites is for the human proteins. The sites are illustrated in the structure of the yeast complex II in fig. S6A. These modifications occur in three clusters: The C-terminal BARA domain of Beclin 1, the Beclin 1 CC2, the N-terminal (NTD) domain of Beclin 1, and the C2 and kinase domains of Vps34. The BARA domain binds membranes in both human and yeast complexes, so PTMs in this domain may interfere with this interaction. In the CC2 region of Vps30, there is a short break in the helical structure, and several of the PTM's are at residues in this region. This region is part of the contact with the WD40 domain of Vps15, so phosphorylation of these residues might cause Vps30 to dissociate from the Vps15/Vps34 dimer. Modifications of the Beclin 1 NTD and BH3 are likely to prevent Beclin 1 from being sequestered in non-catalytic complexes such as the Bcl-2/ Bcl-XL. The C2 domain and its helical insertion are critical to the integrity of the complex, as shown by temperature-sensitive mutations of these regions (Fig. 3B).

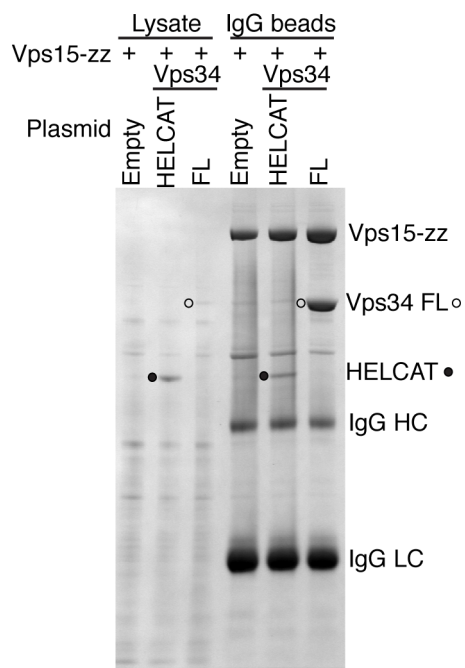

**Fig. S5.** Effect of Vps34-C2 deletion on interaction with Vps15. Protein A-tagged (zz) Vps15 was coexpressed with an empty vector (Empty), HELCAT, or full-length Vps34 (FL) in yeast and pulled down with IgG beads. White circle, full-length Vps34; black circle, HELCAT; IgG HC, IgG heavy-chain; IgG LC, IgG light-chain.

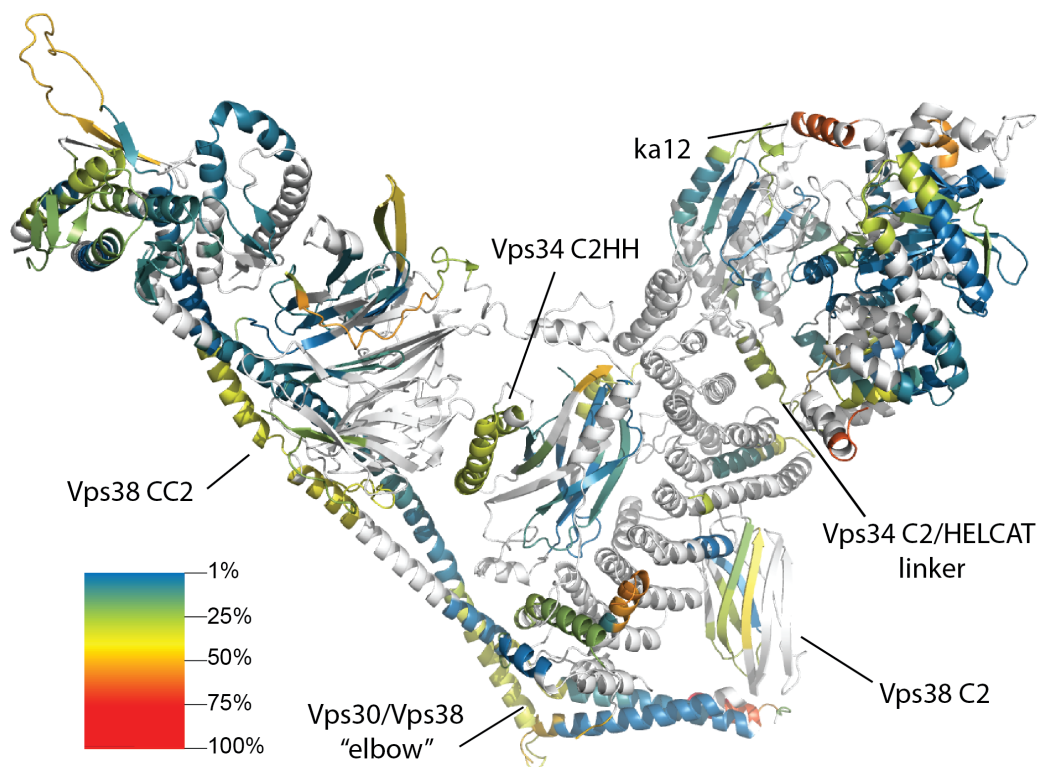

**Fig. S6.** Global HDX at the earliest time point (0.3 s on ice) mapped onto complex II structure. The warmer the colour, the higher is the exchange rate of the corresponding peptide. Regions with no coverage are coloured in grey. Regions exchanging at a higher rate may indicate flexible regions in the complex. These regions include Vps38 CC2 (near the break), the “elbow” between CC1 and CC2 of Vps30 and Vps38, Vps34 C2HH, Vps34  $\alpha$ 12 helix, part of the Vps38 C2 and the C2/HELCA linker.



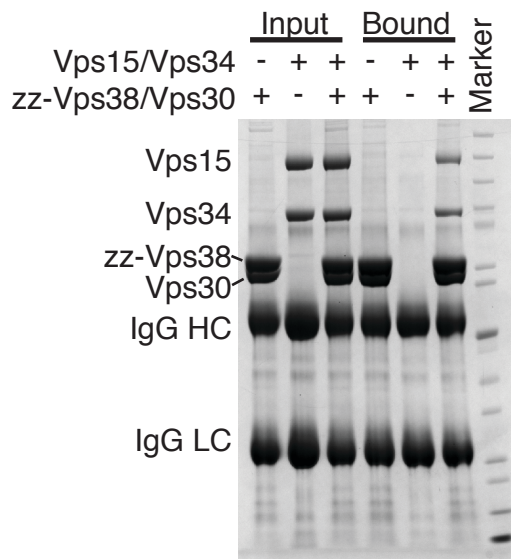

**Fig. S7.** Heterotetrameric Complex II can assemble from separately purified Vps15/Vps34 and Vps38/Vps30 heterodimers. Protein A tagged (zz) Vps38/Vps30 heterodimer was captured on IgG resin. Purified Vps15/Vps34 heterodimer was then captured onto the Vps38/Vps30 heterodimer on the resin. IgG HC: IgG heavy chain, IgG LC: IgG light chain.

**Table S1** Data collection, phasing and refinement statistics for **MIRAS**

|                                                      | Native<br>(7crystals)            | Crystal 1 KR166 (Ta <sub>6</sub> Br <sub>12</sub> ) | Crystal 2 KR168 (Ta <sub>6</sub> Br <sub>12</sub> ) |
|------------------------------------------------------|----------------------------------|-----------------------------------------------------|-----------------------------------------------------|
| <b>Data collection</b>                               |                                  |                                                     |                                                     |
| Space group                                          | P2 <sub>1</sub> 2 <sub>1</sub> 2 | P2 <sub>1</sub> 2 <sub>1</sub> 2                    | P2 <sub>1</sub> 2 <sub>1</sub> 2                    |
| Cell dimensions                                      |                                  |                                                     |                                                     |
| <i>a, b, c</i> (Å)                                   | 215.18<br>226.84<br>127.21       | 215.15<br>226.52<br>127.03                          | 216.14<br>226.13<br>127.29                          |
|                                                      |                                  | <i>Peak</i>                                         | <i>Inflection</i>                                   |
| Wavelength                                           |                                  | 1.254380                                            | 1.254860                                            |
| Resolution (Å)                                       | 49.92 – 4.4<br>(4.58 – 4.4) *    | 60.20 – 6.2<br>(6.93– 6.2) *                        | 60.00 – 6.8<br>(7.62– 6.8) *                        |
| No. of unique reflections                            | 40224                            | 14659                                               | 10925                                               |
| <i>R</i> <sub>sym</sub> or <i>R</i> <sub>merge</sub> | 0.317 (4.82)                     | 0.117 (1.91)                                        | 0.118 (1.17)                                        |
| <i>R</i> <sub>pim</sub>                              | 0.077 (0.67)                     | 0.063 (1.02)                                        | 0.048 (0.48)                                        |
| <i>I</i> / <i>I</i>                                  | 21.0 (1.0)                       | 9.4 (1.0)                                           | 13.9 (2.1)                                          |
| Completeness (%)                                     | 99.8 (98.8)                      | 99.9 (100.0)                                        | 98.9 (96.8)                                         |
| Redundancy                                           | 32.2 (15.8)                      | 8.1 (8.3)                                           | 12.7 (12.6)                                         |
| CC 1/2                                               | 0.999 (0.30)                     | 0.999 (0.522)                                       | 0.999 (0.794)                                       |
| <b>Refinement</b>                                    |                                  |                                                     |                                                     |
| Resolution (Å)                                       | 49.92 – 4.40                     |                                                     |                                                     |
| No. reflections                                      | 40211                            |                                                     |                                                     |
| <i>R</i> <sub>work</sub> / <i>R</i> <sub>free</sub>  | 0.369/0.376                      |                                                     |                                                     |
| No. atoms                                            | 14160                            |                                                     |                                                     |
| Protein                                              | 14160                            |                                                     |                                                     |
| Ligand/ion                                           | 0                                |                                                     |                                                     |
| Water                                                | 0                                |                                                     |                                                     |
| B-factors (Å <sup>2</sup> )                          |                                  |                                                     |                                                     |
| Protein                                              | 259                              |                                                     |                                                     |
| R.m.s deviations                                     |                                  |                                                     |                                                     |
| Bond lengths (Å)                                     | 0.002                            |                                                     |                                                     |
| Bond angles (°)                                      | 0.70                             |                                                     |                                                     |
| Ramachandran values                                  |                                  |                                                     |                                                     |
| Preferred regions                                    | 2652 (94.5%)                     |                                                     |                                                     |
| Allowed regions                                      | 155 (5.5%)                       |                                                     |                                                     |
| Outliers                                             | 0                                |                                                     |                                                     |

\*Highest resolution shell is shown in parenthesis.

| Table S2A | Vps30 |     |    |    |             | Compll |     |     |     | ScVps30 |     |     |     |
|-----------|-------|-----|----|----|-------------|--------|-----|-----|-----|---------|-----|-----|-----|
|           | Start | End | CS | #D | RT          | 0.3    | 3   | 30  | 300 | 0.3     | 3   | 30  | 300 |
|           | 4     | 16  | 2  | 9  | 15.54-15.58 | 18%    | 17% | 24% | 33% | 39%     | 43% | 51% | 50% |
|           | 17    | 27  | 2  | 9  | 14.10-14.28 | 42%    | 66% | 72% | 71% | 74%     | 73% | 76% | 73% |
|           | 17    | 31  | 2  | 13 | 13.62-13.85 | 42%    | 63% | 73% | 70% | 74%     | 72% | 74% | 71% |
|           | 19    | 27  | 2  | 7  | 11.33-11.43 | 4%     | 9%  | 15% | 32% | 69%     | 76% | 76% | 75% |
|           | 32    | 39  | 1  | 6  | 10.10-10.11 | 84%    | 87% | 88% | 85% | 80%     | 81% | 82% | 81% |
|           | 40    | 62  | 3  | 19 | 11.82-11.85 | 63%    | 67% | 68% | 69% | 69%     | 69% | 70% | 68% |
|           | 40    | 76  | 5  | 33 | 13.33-13.45 | 43%    | 50% | 53% | 58% | 60%     | 60% | 62% | 59% |
|           | 42    | 62  | 3  | 17 | 11.78-11.85 | 63%    | 67% | 68% | 70% | 70%     | 70% | 71% | 70% |
|           | 49    | 76  | 4  | 24 | 13.21-13.29 | 31%    | 39% | 43% | 52% | 55%     | 54% | 57% | 54% |
|           | 63    | 76  | 3  | 12 | 12.68-12.93 | 32%    | 40% | 47% | 59% | 62%     | 62% | 63% | 61% |
|           | 77    | 85  | 2  | 7  | 11.04-11.06 | 17%    | 34% | 57% | 64% | 63%     | 62% | 64% | 63% |
|           | 82    | 86  | 1  | 3  | 12.10-12.16 | 9%     | 28% | 53% | 67% | 66%     | 66% | 67% | 65% |
|           | 86    | 97  | 2  | 10 | 13.49-13.54 | 14%    | 16% | 21% | 27% | 27%     | 27% | 28% | 27% |
|           | 87    | 97  | 2  | 9  | 9.86-9.92   | 18%    | 19% | 21% | 21% | 22%     | 22% | 23% | 22% |
|           | 87    | 130 | 5  | 42 | 9.07-9.12   | 39%    | 41% | 41% | 39% | 39%     | 40% | 41% | 40% |
|           | 98    | 130 | 4  | 31 | 6.47-6.64   | 48%    | 48% | 49% | 46% | 46%     | 47% | 48% | 50% |
|           | 131   | 140 | 2  | 8  | 6.11-6.26   | 32%    | 33% | 31% | 30% | 29%     | 30% | 32% | 32% |
|           | 131   | 148 | 3  | 16 | 7.58-7.61   | 47%    | 47% | 47% | 45% | 45%     | 46% | 46% | 48% |
|           | 147   | 152 | 1  | 4  | 12.21-12.27 | 81%    | 85% | 84% | 86% | 90%     | 91% | 92% | 92% |
|           | 153   | 163 | 2  | 9  | 7.96-8.02   | 80%    | 80% | 80% | 79% | 79%     | 80% | 80% | 81% |
|           | 153   | 168 | 2  | 14 | 14.82-14.98 | 68%    | 73% | 78% | 78% | 79%     | 79% | 82% | 79% |
|           | 153   | 171 | 2  | 17 | 17.94-18.03 | 54%    | 63% | 70% | 74% | 82%     | 81% | 81% | 78% |
|           | 169   | 175 | 1  | 5  | 10.57-10.60 | 21%    | 33% | 48% | 68% | 83%     | 84% | 85% | 84% |
|           | 188   | 200 | 2  | 11 | 11.73-11.97 | 2%     | 3%  | 6%  | 17% | 49%     | 60% | 65% | 67% |
|           | 188   | 210 | 4  | 21 | 14.28-14.59 | 1%     | 3%  | 5%  | 14% | 64%     | 70% | 73% | 71% |
|           | 190   | 210 | 4  | 19 | 12.93-12.97 | 2%     | 4%  | 7%  | 17% | 66%     | 71% | 72% | 69% |
|           | 194   | 210 | 3  | 15 | 12.22-12.28 | 1%     | 3%  | 4%  | 11% | 61%     | 63% | 64% | 62% |
|           | 201   | 210 | 2  | 8  | 10.88-10.93 | 2%     | 4%  | 6%  | 18% | 54%     | 54% | 55% | 54% |
|           | 211   | 220 | 2  | 8  | 5.99-6.04   | 49%    | 52% | 61% | 58% | 59%     | 59% | 60% | 62% |
|           | 211   | 247 | 6  | 35 | 9.39-9.44   | 35%    | 41% | 43% | 39% | 41%     | 43% | 44% | 43% |
|           | 211   | 251 | 6  | 39 | 12.66-12.70 | 29%    | 37% | 40% | 39% | 45%     | 46% | 48% | 45% |
|           | 215   | 247 | 6  | 31 | 9.31-9.36   | 36%    | 40% | 43% | 39% | 42%     | 43% | 44% | 43% |
|           | 215   | 251 | 5  | 35 | 12.99-13.03 | 29%    | 36% | 40% | 40% | 45%     | 47% | 48% | 46% |
|           | 252   | 265 | 2  | 12 | 15.19-15.20 | 5%     | 10% | 22% | 32% | 48%     | 52% | 53% | 51% |
|           | 266   | 277 | 3  | 10 | 7.95-7.98   | 9%     | 24% | 53% | 64% | 64%     | 71% | 71% | 72% |
|           | 266   | 278 | 3  | 11 | 8.30-8.34   | 8%     | 24% | 49% | 57% | 59%     | 63% | 65% | 65% |
|           | 266   | 280 | 4  | 13 | 9.51-9.55   | 6%     | 18% | 43% | 57% | 57%     | 60% | 61% | 61% |
|           | 266   | 288 | 4  | 21 | 10.52-10.74 | 8%     | 21% | 43% | 55% | 56%     | 59% | 60% | 59% |
|           | 289   | 305 | 3  | 15 | 15.76-15.81 | 5%     | 10% | 27% | 43% | 64%     | 66% | 68% | 65% |
|           | 297   | 305 | 2  | 7  | 11.33-11.43 | 4%     | 11% | 14% | 33% | 69%     | 76% | 76% | 76% |
|           | 297   | 327 | 5  | 29 | 16.80-16.97 | 7%     | 11% | 15% | 33% | 72%     | 77% | 79% | 76% |
|           | 306   | 311 | 1  | 4  | 15.07-15.13 | 7%     | 9%  | 9%  | 19% | 69%     | 83% | 83% | 82% |
|           | 310   | 327 | 3  | 16 | 16.19-16.26 | 12%    | 15% | 21% | 33% | 59%     | 65% | 67% | 64% |
|           | 312   | 327 | 3  | 14 | 15.88-16.05 | 15%    | 21% | 27% | 42% | 67%     | 75% | 77% | 74% |
|           | 318   | 327 | 2  | 8  | 14.85-14.92 | 20%    | 28% | 33% | 47% | 67%     | 76% | 77% | 76% |
|           | 327   | 357 | 4  | 26 | 16.21-16.25 | 10%    | 13% | 18% | 24% | 12%     | 16% | 23% | 35% |
|           | 328   | 357 | 4  | 25 | 15.74-15.89 | 10%    | 13% | 17% | 24% | 12%     | 16% | 23% | 36% |
|           | 341   | 363 | 3  | 19 | 17.95-18.04 | 9%     | 13% | 18% | 26% | 11%     | 15% | 22% | 31% |
|           | 358   | 363 | 1  | 4  | 12.35-12.41 | 3%     | 5%  | 3%  | 4%  | 1%      | 0%  | 0%  | 0%  |
|           | 366   | 378 | 3  | 11 | 14.00-14.04 | 19%    | 23% | 26% | 38% | 17%     | 22% | 31% | 42% |
|           | 367   | 378 | 2  | 10 | 12.90-12.95 | 21%    | 24% | 28% | 40% | 17%     | 22% | 32% | 44% |
|           | 368   | 378 | 2  | 9  | 12.05-12.11 | 25%    | 27% | 33% | 47% | 20%     | 26% | 37% | 50% |
|           | 369   | 378 | 2  | 8  | 12.86-12.89 | 25%    | 28% | 33% | 48% | 20%     | 26% | 36% | 49% |
|           | 385   | 389 | 1  | 3  | 16.21-16.39 | 13%    | 20% | 29% | 32% | 26%     | 29% | 38% | 50% |
|           | 390   | 399 | 3  | 8  | 4.10-4.36   | 33%    | 36% | 39% | 45% | 32%     | 36% | 36% | 46% |
|           | 390   | 401 | 3  | 10 | 5.50-5.54   | 41%    | 45% | 46% | 48% | 40%     | 43% | 44% | 51% |
|           | 390   | 412 | 3  | 20 | 7.52-7.56   | 49%    | 52% | 52% | 52% | 49%     | 51% | 52% | 56% |
|           | 390   | 413 | 3  | 21 | 10.40-10.59 | 45%    | 49% | 49% | 48% | 45%     | 46% | 48% | 49% |
|           | 414   | 419 | 1  | 3  | 16.25-16.29 | 8%     | 11% | 10% | 18% | 4%      | 3%  | 3%  | 4%  |
|           | 424   | 443 | 4  | 18 | 13.00-13.08 | 31%    | 37% | 35% | 37% | 31%     | 34% | 37% | 38% |
|           | 425   | 444 | 4  | 18 | 12.49-12.53 | 25%    | 32% | 31% | 33% | 25%     | 28% | 31% | 33% |
|           | 427   | 444 | 3  | 16 | 10.80-10.98 | 13%    | 17% | 19% | 20% | 12%     | 14% | 17% | 21% |
|           | 445   | 449 | 1  | 3  | 9.52-9.56   | 4%     | 5%  | 4%  | 7%  | 1%      | 1%  | 2%  | 4%  |
|           | 450   | 456 | 2  | 5  | 7.14-7.16   | 25%    | 34% | 40% | 49% | 17%     | 26% | 36% | 43% |
|           | 451   | 456 | 1  | 4  | 7.14-7.18   | 30%    | 38% | 46% | 57% | 20%     | 28% | 40% | 48% |
|           | 451   | 457 | 2  | 5  | 7.14-7.16   | 26%    | 34% | 40% | 49% | 17%     | 25% | 36% | 43% |
|           | 487   | 502 | 3  | 13 | 16.01-16.07 | 21%    | 28% | 33% | 35% | 22%     | 29% | 35% | 36% |
|           | 491   | 502 | 3  | 10 | 11.88-12.02 | 20%    | 27% | 34% | 37% | 23%     | 32% | 40% | 42% |
|           | 503   | 513 | 2  | 8  | 8.81-8.88   | 22%    | 25% | 27% | 30% | 21%     | 22% | 25% | 34% |
|           | 503   | 518 | 2  | 13 | 12.24-12.41 | 21%    | 24% | 25% | 31% | 20%     | 20% | 23% | 30% |
|           | 503   | 521 | 3  | 16 | 14.80-14.84 | 11%    | 11% | 13% | 18% | 12%     | 13% | 15% | 22% |
|           | 514   | 521 | 2  | 6  | 15.01-15.05 | 5%     | 4%  | 5%  | 7%  | 1%      | 1%  | 1%  | 1%  |
|           | 522   | 531 | 2  | 8  | 17.28-17.40 | 1%     | 1%  | 3%  | 9%  | 1%      | 4%  | 10% | 11% |
|           | 522   | 532 | 2  | 9  | 18.27-18.32 | 0%     | 2%  | 4%  | 12% | 2%      | 5%  | 14% | 21% |

**Table S2B**

|       |      | Vps15 |    |             |     | Compll |     |     |      |     | ScVps34-15 |     |     |      |  |
|-------|------|-------|----|-------------|-----|--------|-----|-----|------|-----|------------|-----|-----|------|--|
| Start | End  | CS    | #D | RT          | 0.3 | 3      | 30  | 300 | 3000 | 0.3 | 3          | 30  | 300 | 3000 |  |
| 34    | 50   | 3     | 14 | 11.52-11.55 | 3%  | 6%     | 8%  | 12% | 15%  | 6%  | 9%         | 11% | 16% | 20%  |  |
| 39    | 50   | 2     | 9  | 8.87-8.90   | 2%  | 4%     | 4%  | 4%  | 8%   | 3%  | 5%         | 4%  | 7%  | 10%  |  |
| 56    | 69   | 3     | 10 | 14.23-14.37 | 27% | 33%    | 37% | 43% | 49%  | 29% | 35%        | 40% | 46% | 53%  |  |
| 70    | 77   | 2     | 6  | 8.84-8.88   | 6%  | 10%    | 20% | 41% | 61%  | 2%  | 8%         | 21% | 42% | 65%  |  |
| 70    | 91   | 5     | 19 | 13.43-13.47 | 7%  | 11%    | 15% | 25% | 31%  | 8%  | 13%        | 19% | 29% | 39%  |  |
| 77    | 88   | 2     | 9  | 15.10-15.14 | 10% | 13%    | 19% | 33% | 40%  | 11% | 16%        | 25% | 37% | 46%  |  |
| 78    | 88   | 2     | 8  | 13.22-13.30 | 10% | 13%    | 21% | 36% | 39%  | 11% | 16%        | 25% | 38% | 42%  |  |
| 78    | 91   | 3     | 11 | 12.90-12.94 | 10% | 15%    | 19% | 28% | 31%  | 13% | 18%        | 23% | 32% | 40%  |  |
| 92    | 109  | 3     | 16 | 11.22-11.30 | 3%  | 7%     | 9%  | 12% | 16%  | 3%  | 6%         | 9%  | 14% | 19%  |  |
| 100   | 109  | 3     | 8  | 7.59-7.94   | 3%  | 7%     | 9%  | 14% | 15%  | 3%  | 7%         | 11% | 17% | 19%  |  |
| 184   | 196  | 3     | 11 | 13.20-13.30 | 11% | 20%    | 28% | 38% | 34%  | 9%  | 14%        | 18% | 24% | 28%  |  |
| 233   | 243  | 2     | 8  | 16.67-16.84 | 4%  | 10%    | 14% | 23% | 37%  | 7%  | 12%        | 16% | 30% | 45%  |  |
| 233   | 246  | 2     | 11 | 17.42-17.55 | 6%  | 15%    | 18% | 34% | 44%  | 9%  | 16%        | 20% | 37% | 52%  |  |
| 234   | 246  | 2     | 10 | 16.96-17.10 | 11% | 19%    | 24% | 37% | 46%  | 12% | 21%        | 26% | 40% | 55%  |  |
| 247   | 261  | 3     | 13 | 12.62-12.66 | 13% | 17%    | 27% | 34% | 39%  | 14% | 21%        | 31% | 38% | 43%  |  |
| 262   | 272  | 2     | 9  | 9.85-9.89   | 23% | 23%    | 31% | 33% | 47%  | 23% | 26%        | 34% | 39% | 52%  |  |
| 359   | 377  | 2     | 14 | 17.43-17.51 | 36% | 37%    | 43% | 45% | 49%  | 37% | 39%        | 45% | 49% | 53%  |  |
| 540   | 551  | 2     | 10 | 17.47-17.60 | 10% | 18%    | 25% | 32% | 41%  | 21% | 27%        | 33% | 38% | 52%  |  |
| 552   | 565  | 2     | 12 | 6.38-6.70   | 39% | 37%    | 39% | 38% | 36%  | 39% | 40%        | 42% | 41% | 41%  |  |
| 601   | 610  | 2     | 7  | 17.24-17.33 | 32% | 31%    | 37% | 48% | 52%  | 24% | 29%        | 32% | 43% | 51%  |  |
| 634   | 640  | 1     | 4  | 15.68-15.79 | 1%  | 1%     | 0%  | 1%  | 1%   | 1%  | 0%         | 0%  | -1% | 1%   |  |
| 761   | 773  | 2     | 10 | 13.89-13.97 | 17% | 24%    | 26% | 26% | 26%  | 19% | 24%        | 27% | 28% | 30%  |  |
| 776   | 785  | 2     | 8  | 13.64-13.75 | 20% | 27%    | 26% | 31% | 42%  | 22% | 24%        | 26% | 34% | 47%  |  |
| 777   | 785  | 2     | 7  | 11.08-11.16 | 26% | 33%    | 34% | 40% | 47%  | 26% | 29%        | 32% | 39% | 49%  |  |
| 786   | 800  | 2     | 13 | 10.59-10.64 | 22% | 34%    | 42% | 43% | 43%  | 24% | 36%        | 44% | 45% | 46%  |  |
| 805   | 816  | 2     | 10 | 11.18-11.21 | 49% | 51%    | 51% | 47% | 46%  | 50% | 51%        | 53% | 51% | 52%  |  |
| 850   | 857  | 2     | 6  | 14.71-14.75 | 2%  | 4%     | 5%  | 9%  | 15%  | 2%  | 3%         | 4%  | 9%  | 17%  |  |
| 858   | 862  | 1     | 3  | 12.10-12.43 | 21% | 26%    | 29% | 41% | 60%  | 22% | 23%        | 28% | 46% | 61%  |  |
| 858   | 873  | 3     | 14 | 17.35-17.39 | 15% | 21%    | 25% | 33% | 41%  | 16% | 22%        | 26% | 35% | 44%  |  |
| 863   | 873  | 2     | 9  | 16.33-16.36 | 9%  | 16%    | 17% | 25% | 29%  | 5%  | 10%        | 15% | 22% | 29%  |  |
| 863   | 875  | 3     | 11 | 14.25-14.33 | 9%  | 13%    | 17% | 23% | 31%  | 10% | 14%        | 18% | 24% | 33%  |  |
| 876   | 896  | 3     | 17 | 12.26-12.31 | 53% | 58%    | 60% | 59% | 59%  | 53% | 59%        | 60% | 62% | 67%  |  |
| 881   | 910  | 3     | 23 | 14.35-14.45 | 57% | 62%    | 59% | 58% | 56%  | 56% | 62%        | 60% | 60% | 65%  |  |
| 897   | 910  | 2     | 9  | 13.42-13.52 | 73% | 75%    | 75% | 73% | 69%  | 75% | 77%        | 76% | 75% | 77%  |  |
| 909   | 920  | 2     | 9  | 17.89-18.13 | 30% | 44%    | 58% | 71% | 73%  | 45% | 59%        | 65% | 72% | 78%  |  |
| 911   | 920  | 2     | 7  | 17.33-17.43 | 23% | 37%    | 57% | 73% | 75%  | 41% | 59%        | 65% | 73% | 81%  |  |
| 1040  | 1057 | 3     | 13 | 14.40-14.46 | 14% | 26%    | 36% | 51% | 59%  | 25% | 46%        | 55% | 63% | 68%  |  |
| 1049  | 1057 | 2     | 6  | 12.24-12.42 | 27% | 37%    | 46% | 63% | 74%  | 35% | 50%        | 59% | 70% | 73%  |  |
| 1058  | 1071 | 3     | 11 | 10.73-10.76 | 53% | 61%    | 63% | 60% | 59%  | 54% | 58%        | 62% | 62% | 63%  |  |
| 1058  | 1075 | 4     | 15 | 13.55-13.60 | 33% | 41%    | 43% | 47% | 53%  | 41% | 51%        | 58% | 62% | 66%  |  |
| 1059  | 1071 | 3     | 10 | 10.52-10.68 | 52% | 59%    | 62% | 59% | 59%  | 51% | 58%        | 61% | 61% | 62%  |  |
| 1076  | 1096 | 2     | 16 | 14.28-14.64 | 9%  | 16%    | 22% | 27% | 31%  | 23% | 34%        | 40% | 45% | 55%  |  |
| 1097  | 1110 | 2     | 12 | 17.04-17.09 | 8%  | 11%    | 12% | 17% | 25%  | 13% | 17%        | 24% | 35% | 50%  |  |
| 1143  | 1155 | 2     | 11 | 15.06-15.10 | 2%  | 3%     | 3%  | 9%  | 17%  | 2%  | 4%         | 5%  | 11% | 22%  |  |
| 1156  | 1164 | 2     | 7  | 4.95-5.00   | 45% | 46%    | 51% | 52% | 52%  | 44% | 50%        | 55% | 57% | 55%  |  |
| 1156  | 1165 | 2     | 8  | 5.47-5.50   | 45% | 46%    | 52% | 50% | 51%  | 44% | 49%        | 55% | 56% | 55%  |  |
| 1156  | 1168 | 3     | 11 | 10.10-10.14 | 34% | 42%    | 48% | 46% | 47%  | 37% | 43%        | 49% | 48% | 49%  |  |
| 1156  | 1171 | 3     | 14 | 12.22-12.29 | 28% | 36%    | 45% | 45% | 44%  | 33% | 40%        | 45% | 46% | 46%  |  |
| 1315  | 1338 | 3     | 20 | 17.59-17.64 | 24% | 34%    | 36% | 36% | 38%  | 39% | 44%        | 46% | 47% | 52%  |  |
| 1327  | 1338 | 2     | 9  | 15.47-15.51 | 39% | 56%    | 58% | 64% | 59%  | 60% | 68%        | 67% | 74% | 72%  |  |
| 1352  | 1364 | 2     | 11 | 12.99-13.07 | 12% | 14%    | 20% | 23% | 26%  | 35% | 38%        | 43% | 48% | 54%  |  |
| 1352  | 1368 | 2     | 15 | 12.52-12.64 | 8%  | 13%    | 20% | 27% | 34%  | 42% | 42%        | 49% | 55% | 60%  |  |
| 1352  | 1371 | 2     | 18 | 15.40-15.44 | 5%  | 11%    | 18% | 27% | 36%  | 34% | 35%        | 44% | 53% | 55%  |  |
| 1406  | 1421 | 3     | 14 | 6.89-7.01   | 23% | 25%    | 25% | 23% | 22%  | 23% | 25%        | 29% | 29% | 27%  |  |
| 1422  | 1429 | 2     | 6  | 7.78-8.09   | 2%  | 4%     | 4%  | 7%  | 20%  | 40% | 41%        | 43% | 45% | 45%  |  |
| 1442  | 1449 | 1     | 6  | 9.88-9.99   | 4%  | 4%     | 4%  | 6%  | 15%  | 47% | 47%        | 54% | 57% | 60%  |  |

**Table S2C**

|       |     |    |    | Vps34       | Compll |     |     |     |      | ScVps34-15 |     |     |     |      |
|-------|-----|----|----|-------------|--------|-----|-----|-----|------|------------|-----|-----|-----|------|
| Start | End | CS | #D | RT          | 0.3    | 3   | 30  | 300 | 3000 | 0.3        | 3   | 30  | 300 | 3000 |
| 2     | 8   | 1  | 5  | 14.97-14.98 | 23%    | 31% | 39% | 53% | 56%  | 40%        | 56% | 61% | 67% | 74%  |
| 56    | 60  | 1  | 3  | 15.00-15.18 | 2%     | 2%  | 1%  | 2%  | 1%   | 2%         | 1%  | 1%  | 0%  | 2%   |
| 61    | 73  | 3  | 11 | 10.68-10.75 | 2%     | 5%  | 10% | 19% | 32%  | 3%         | 6%  | 13% | 21% | 34%  |
| 63    | 73  | 3  | 9  | 9.66-9.84   | 12%    | 12% | 13% | 22% | 30%  | 2%         | 6%  | 13% | 21% | 32%  |
| 74    | 87  | 3  | 10 | 13.77-13.80 | 11%    | 13% | 13% | 24% | 41%  | 12%        | 13% | 14% | 27% | 48%  |
| 74    | 91  | 3  | 14 | 17.72-17.80 | 5%     | 9%  | 12% | 19% | 33%  | 7%         | 10% | 13% | 22% | 40%  |
| 92    | 107 | 3  | 13 | 14.91-15.01 | 3%     | 6%  | 8%  | 11% | 14%  | 4%         | 6%  | 8%  | 12% | 17%  |
| 94    | 107 | 3  | 12 | 14.96-15.00 | 3%     | 5%  | 8%  | 11% | 14%  | 4%         | 6%  | 8%  | 12% | 17%  |
| 112   | 123 | 2  | 9  | 17.45-17.57 | 2%     | 7%  | 16% | 18% | 18%  | 3%         | 9%  | 17% | 19% | 26%  |
| 112   | 125 | 2  | 11 | 17.89-18.07 | 2%     | 6%  | 16% | 20% | 20%  | 3%         | 9%  | 18% | 21% | 28%  |
| 128   | 144 | 3  | 15 | 15.80-15.90 | 10%    | 14% | 19% | 24% | 27%  | 12%        | 19% | 24% | 28% | 33%  |
| 131   | 144 | 3  | 12 | 13.18-13.24 | 7%     | 11% | 18% | 25% | 27%  | 11%        | 19% | 27% | 31% | 37%  |
| 138   | 144 | 2  | 5  | 10.34-10.37 | 2%     | 6%  | 14% | 25% | 25%  | 7%         | 15% | 23% | 27% | 30%  |
| 138   | 154 | 4  | 15 | 12.47-12.51 | 3%     | 7%  | 12% | 21% | 27%  | 5%         | 12% | 20% | 26% | 29%  |
| 145   | 154 | 3  | 8  | 11.54-11.58 | 6%     | 11% | 20% | 30% | 34%  | 9%         | 19% | 28% | 35% | 39%  |
| 147   | 154 | 2  | 6  | 10.33-10.36 | 10%    | 17% | 28% | 34% | 34%  | 13%        | 23% | 33% | 35% | 36%  |
| 155   | 166 | 2  | 10 | 9.12-9.19   | 30%    | 39% | 51% | 56% | 54%  | 45%        | 54% | 59% | 60% | 59%  |
| 155   | 174 | 3  | 18 | 14.88-15.09 | 15%    | 23% | 42% | 55% | 56%  | 37%        | 48% | 56% | 57% | 60%  |
| 174   | 182 | 2  | 6  | 17.01-17.05 | 22%    | 28% | 33% | 51% | 54%  | 34%        | 44% | 48% | 53% | 57%  |
| 175   | 180 | 2  | 3  | 16.49-16.53 | 36%    | 42% | 50% | 80% | 87%  | 54%        | 71% | 79% | 90% | 95%  |
| 181   | 193 | 3  | 11 | 8.94-8.97   | 28%    | 36% | 44% | 52% | 64%  | 37%        | 53% | 63% | 69% | 70%  |
| 181   | 201 | 4  | 18 | 10.06-10.14 | 32%    | 39% | 44% | 50% | 57%  | 41%        | 50% | 58% | 61% | 64%  |
| 181   | 202 | 4  | 19 | 11.71-11.75 | 28%    | 35% | 39% | 44% | 49%  | 34%        | 43% | 49% | 53% | 56%  |
| 183   | 201 | 4  | 16 | 8.75-8.78   | 31%    | 37% | 39% | 41% | 46%  | 35%        | 42% | 48% | 49% | 50%  |
| 209   | 213 | 1  | 3  | 16.16-16.24 | 21%    | 33% | 43% | 75% | 84%  | 37%        | 55% | 68% | 82% | 89%  |
| 218   | 223 | 2  | 4  | 10.23-10.27 | 30%    | 44% | 66% | 72% | 64%  | 41%        | 58% | 71% | 72% | 72%  |
| 218   | 227 | 2  | 8  | 11.62-11.76 | 50%    | 63% | 71% | 75% | 75%  | 60%        | 71% | 78% | 81% | 81%  |
| 224   | 241 | 2  | 14 | 12.28-12.33 | 47%    | 57% | 68% | 66% | 64%  | 53%        | 65% | 69% | 67% | 69%  |
| 228   | 241 | 2  | 10 | 10.89-11.02 | 55%    | 66% | 75% | 75% | 71%  | 60%        | 71% | 74% | 74% | 75%  |
| 242   | 264 | 5  | 19 | 11.24-11.26 | 24%    | 32% | 38% | 40% | 42%  | 28%        | 35% | 41% | 44% | 48%  |
| 265   | 279 | 2  | 10 | 11.74-12.03 | 14%    | 23% | 32% | 43% | 39%  | 17%        | 26% | 35% | 45% | 47%  |
| 265   | 293 | 4  | 24 | 11.85-11.96 | 20%    | 26% | 34% | 41% | 49%  | 22%        | 30% | 39% | 49% | 59%  |
| 280   | 293 | 3  | 12 | 6.29-6.34   | 31%    | 34% | 38% | 39% | 41%  | 31%        | 37% | 44% | 46% | 50%  |
| 294   | 307 | 4  | 11 | 8.27-8.34   | 32%    | 43% | 50% | 49% | 53%  | 35%        | 46% | 52% | 54% | 58%  |
| 294   | 319 | 5  | 21 | 11.20-11.29 | 19%    | 27% | 32% | 35% | 42%  | 22%        | 31% | 34% | 41% | 49%  |
| 294   | 332 | 6  | 34 | 11.32-11.58 | 9%     | 13% | 16% | 17% | 24%  | 11%        | 15% | 18% | 22% | 29%  |
| 320   | 332 | 4  | 11 | 10.82-10.86 | 1%     | 2%  | 2%  | 4%  | 6%   | 1%         | 2%  | 2%  | 4%  | 10%  |
| 333   | 344 | 3  | 10 | 10.31-10.34 | 1%     | 5%  | 10% | 22% | 31%  | 2%         | 5%  | 12% | 26% | 37%  |
| 345   | 350 | 1  | 4  | 9.67-9.74   | 48%    | 52% | 71% | 72% | 77%  | 52%        | 60% | 79% | 79% | 80%  |
| 376   | 387 | 2  | 10 | 15.31-15.36 | 35%    | 42% | 51% | 47% | 50%  | 38%        | 44% | 50% | 49% | 53%  |
| 376   | 405 | 4  | 28 | 13.65-13.83 | 11%    | 17% | 19% | 22% | 28%  | 13%        | 18% | 22% | 25% | 34%  |
| 386   | 405 | 4  | 18 | 11.18-11.22 | 8%     | 13% | 18% | 22% | 30%  | 10%        | 16% | 21% | 27% | 36%  |
| 388   | 402 | 4  | 13 | 6.14-6.36   | 10%    | 11% | 16% | 16% | 25%  | 11%        | 13% | 18% | 22% | 33%  |
| 388   | 405 | 4  | 16 | 9.95-10.10  | 6%     | 9%  | 10% | 12% | 19%  | 7%         | 9%  | 12% | 15% | 23%  |
| 431   | 447 | 2  | 15 | 13.96-14.04 | 65%    | 65% | 65% | 63% | 65%  | 65%        | 67% | 66% | 65% | 68%  |
| 435   | 447 | 2  | 11 | 11.82-11.95 | 47%    | 47% | 47% | 45% | 49%  | 53%        | 55% | 55% | 54% | 55%  |
| 448   | 464 | 3  | 15 | 10.26-10.31 | 49%    | 52% | 51% | 49% | 49%  | 50%        | 50% | 54% | 50% | 52%  |
| 448   | 473 | 3  | 24 | 11.59-11.66 | 52%    | 53% | 52% | 49% | 50%  | 50%        | 52% | 54% | 52% | 53%  |
| 448   | 483 | 4  | 32 | 16.66-16.74 | 40%    | 45% | 45% | 44% | 46%  | 41%        | 46% | 46% | 46% | 49%  |
| 449   | 464 | 3  | 14 | 10.25-10.28 | 57%    | 57% | 57% | 54% | 53%  | 56%        | 57% | 59% | 57% | 58%  |
| 474   | 483 | 2  | 7  | 18.07-18.13 | 34%    | 47% | 50% | 57% | 67%  | 39%        | 48% | 50% | 58% | 72%  |
| 483   | 497 | 3  | 12 | 13.54-13.60 | 1%     | 4%  | 8%  | 15% | 21%  | 2%         | 4%  | 9%  | 16% | 23%  |
| 484   | 497 | 3  | 11 | 11.99-12.08 | 1%     | 3%  | 9%  | 16% | 22%  | 2%         | 4%  | 10% | 18% | 25%  |
| 484   | 498 | 3  | 12 | 13.54-13.59 | 2%     | 4%  | 8%  | 15% | 20%  | 2%         | 4%  | 9%  | 16% | 23%  |
| 485   | 497 | 3  | 10 | 11.60-11.64 | 1%     | 3%  | 9%  | 17% | 25%  | 2%         | 5%  | 11% | 19% | 27%  |
| 501   | 512 | 2  | 9  | 10.95-11.00 | 13%    | 18% | 24% | 30% | 33%  | 14%        | 18% | 27% | 35% | 36%  |
| 503   | 512 | 2  | 7  | 9.81-9.85   | 17%    | 23% | 32% | 43% | 42%  | 18%        | 22% | 33% | 44% | 43%  |
| 503   | 516 | 2  | 11 | 14.87-14.88 | 13%    | 15% | 25% | 38% | 40%  | 16%        | 18% | 32% | 41% | 46%  |
| 520   | 533 | 3  | 12 | 9.67-9.83   | 7%     | 11% | 15% | 20% | 27%  | 8%         | 11% | 17% | 24% | 33%  |
| 546   | 561 | 4  | 14 | 9.54-9.60   | 31%    | 41% | 50% | 55% | 58%  | 32%        | 42% | 57% | 59% | 63%  |
| 547   | 561 | 4  | 13 | 8.51-8.64   | 28%    | 38% | 48% | 51% | 53%  | 28%        | 39% | 53% | 55% | 58%  |
| 548   | 561 | 3  | 12 | 7.96-7.99   | 23%    | 32% | 41% | 44% | 43%  | 25%        | 34% | 46% | 49% | 48%  |
| 562   | 581 | 4  | 16 | 12.64-12.70 | 2%     | 5%  | 9%  | 14% | 25%  | 3%         | 6%  | 11% | 16% | 30%  |
| 562   | 588 | 4  | 21 | 14.62-14.82 | 2%     | 4%  | 7%  | 11% | 21%  | 2%         | 5%  | 9%  | 14% | 27%  |
| 582   | 588 | 1  | 4  | 14.12-14.29 | 7%     | 10% | 8%  | 26% | 31%  | 3%         | 3%  | 3%  | 16% | 34%  |
| 589   | 611 | 3  | 19 | 15.88-15.98 | 22%    | 27% | 33% | 42% | 50%  | 23%        | 29% | 37% | 47% | 54%  |
| 600   | 611 | 2  | 9  | 15.19-15.27 | 18%    | 20% | 22% | 36% | 44%  | 17%        | 19% | 25% | 37% | 46%  |
| 612   | 634 | 4  | 20 | 14.42-14.54 | 5%     | 11% | 18% | 27% | 29%  | 7%         | 13% | 22% | 27% | 30%  |
| 624   | 634 | 2  | 9  | 10.45-10.51 | 4%     | 11% | 22% | 35% | 37%  | 7%         | 15% | 29% | 38% | 40%  |
| 642   | 653 | 2  | 10 | 13.48-13.53 | 3%     | 5%  | 6%  | 11% | 19%  | 4%         | 5%  | 6%  | 13% | 25%  |
| 654   | 671 | 2  | 14 | 12.37-12.66 | 3%     | 4%  | 8%  | 14% | 16%  | 2%         | 5%  | 9%  | 13% | 17%  |
| 654   | 672 | 2  | 15 | 15.01-15.06 | 2%     | 4%  | 7%  | 10% | 13%  | 2%         | 6%  | 8%  | 12% | 15%  |
| 654   | 678 | 3  | 20 | 15.74-15.88 | 2%     | 5%  | 10% | 15% | 19%  | 3%         | 7%  | 12% | 17% | 22%  |
| 679   | 690 | 2  | 10 | 13.53-13.64 | 16%    | 34% | 44% | 43% | 46%  | 23%        | 39% | 46% | 46% | 52%  |
| 679   | 703 | 4  | 22 | 16.02-16.07 | 14%    | 21% | 26% | 26% | 29%  | 16%        | 24% | 27% | 28% | 34%  |
| 708   | 712 | 1  | 3  | 13.36-13.54 | 2%     | 6%  | 2%  | 4%  | 6%   | 1%         | 1%  | 1%  | 1%  | 9%   |
| 715   | 719 | 1  | 3  | 6.40-6.65   | 1%     | 3%  | 2%  | 4%  | 4%   | 1%         | 1%  | 1%  | 1%  | 1%   |
| 738   | 750 | 2  | 10 | 14.88-14.92 | 1%     | 3%  | 3%  | 7%  | 11%  | 2%         | 3%  | 5%  | 10% | 14%  |
| 740   | 750 | 2  | 9  | 14.89-14.95 | 1%     | 1%  | 2%  | 5%  | 10%  | 1%         | 1%  | 3%  | 8%  | 12%  |
| 751   | 773 | 3  | 15 | 16.34-16.38 | 14%    | 24% | 37% | 49% | 58%  | 22%        | 31% | 42% | 52% | 65%  |
| 751   | 774 | 3  | 16 | 16.51-16.68 | 13%    | 23% | 36% | 47% | 59%  | 21%        | 30% | 40% | 50% | 66%  |
| 775   | 782 | 1  | 6  | 6.74-6.87   | 55%    | 56% | 60% | 57% | 56%  | 55%        | 59% | 63% | 62% | 62%  |
| 775   | 786 | 2  | 10 | 12.53-12.57 | 20%    | 29% | 36% | 40% | 41%  | 20%        | 30% | 37% | 41% | 46%  |
| 775   | 791 | 3  | 15 | 15.37-15.44 | 5%     | 10% | 14% | 18% | 25%  | 6%         | 11% | 14% | 18% | 27%  |
| 792   | 807 | 3  | 14 | 16.52-16.57 | 2%     | 6%  | 7%  | 11% | 18%  | 3%         | 7%  | 8%  | 12% | 20%  |
| 793   | 803 | 2  | 9  | 12.11-12.16 | 4%     | 10% | 13% | 16% | 25%  | 6%         | 10% | 12% | 17% | 29%  |
| 798   | 807 | 2  | 8  | 14.26-14.37 | 6%     | 11% | 13% | 16% | 24%  | 5%         | 7%  | 10% | 16% | 25%  |
| 812   | 828 | 2  | 13 | 14.22-14.26 | 3%     | 10% | 13% | 23% | 42%  | 4%         | 9%  | 14% | 28% | 48%  |
| 829   | 838 | 3  | 8  | 11.11-11.30 | 23%    | 28% | 38% | 44% | 54%  | 23%        | 30% | 40% | 47% | 59%  |
| 839   | 850 | 2  | 10 | 13.27-13.33 | 5%     | 7%  | 13% | 30% | 49%  | 5%         | 7%  | 16% | 36% | 55%  |
| 839   | 853 | 2  | 13 | 14.06-14.16 | 3%     | 5%  | 12% | 27% | 43%  | 3%         | 7%  | 15% | 32% | 48%  |
| 851   | 856 | 1  | 4  | 6.78-6.82   | 19%    | 31% | 61% | 77% | 77%  | 27%        | 41% | 72% | 79% | 79%  |
| 857   | 872 | 2  | 13 | 17.33-17.38 | 64%    | 70% | 71% | 72% | 72%  | 64%        | 70% | 73% | 72% | 73%  |
| 860   | 872 | 2  | 11 | 13.20-13.29 | 52%    | 54% | 54% | 52% | 52%  | 53%        | 53% | 53% | 52% | 54%  |

|       |       | Vps38 |    |    |             | Compll |     |     |     |     |      |
|-------|-------|-------|----|----|-------------|--------|-----|-----|-----|-----|------|
| Table | Start | End   | CS | #D | RT          | 0.3    | 0.3 | 3   | 30  | 300 | 3000 |
| S2D   | 24    | 32    | 2  | 7  | 7.97-8.05   | 8%     | 45% | 54% | 54% | 52% | 50%  |
|       | 33    | 44    | 2  | 9  | 17.68-17.77 | 18%    | 17% | 26% | 27% | 33% | 33%  |
|       | 33    | 45    | 2  | 10 | 18.30-18.37 | 18%    | 15% | 23% | 24% | 29% | 29%  |
|       | 45    | 55    | 2  | 9  | 17.29-17.34 | 17%    | 29% | 35% | 42% | 47% | 46%  |
|       | 58    | 70    | 2  | 11 | 13.13-13.35 | 13%    | 13% | 27% | 36% | 42% | 42%  |
|       | 66    | 82    | 3  | 14 | 12.84-13.02 | 13%    | 22% | 32% | 34% | 39% | 42%  |
|       | 71    | 82    | 2  | 9  | 11.84-12.03 | 12%    | 31% | 44% | 48% | 53% | 58%  |
|       | 83    | 98    | 2  | 13 | 17.88-17.93 | 18%    | 2%  | 4%  | 9%  | 19% | 25%  |
|       | 86    | 96    | 2  | 8  | 16.16-16.20 | 16%    | 3%  | 5%  | 7%  | 13% | 22%  |
|       | 99    | 111   | 2  | 11 | 12.68-12.78 | 13%    | 25% | 29% | 28% | 29% | 31%  |
|       | 117   | 129   | 2  | 10 | 13.94-14.06 | 14%    | 17% | 21% | 28% | 33% | 40%  |
|       | 152   | 172   | 3  | 18 | 7.57-7.67   | 8%     | 44% | 48% | 48% | 46% | 44%  |
|       | 185   | 203   | 3  | 17 | 13.48-13.53 | 13%    | 2%  | 5%  | 11% | 25% | 43%  |
|       | 191   | 203   | 2  | 11 | 10.70-10.71 | 11%    | 3%  | 10% | 18% | 35% | 53%  |
|       | 191   | 212   | 3  | 20 | 17.74-17.76 | 18%    | 4%  | 11% | 17% | 36% | 58%  |
|       | 204   | 212   | 2  | 7  | 12.94-12.96 | 13%    | 9%  | 22% | 31% | 39% | 48%  |
|       | 213   | 221   | 2  | 7  | 10.94-11.01 | 11%    | 40% | 50% | 48% | 50% | 45%  |
|       | 222   | 231   | 2  | 8  | 8.25-8.28   | 8%     | 3%  | 4%  | 7%  | 23% | 41%  |
|       | 222   | 233   | 2  | 10 | 11.88-11.95 | 12%    | 2%  | 3%  | 5%  | 24% | 41%  |
|       | 253   | 265   | 2  | 11 | 8.54-8.59   | 9%     | 42% | 43% | 44% | 41% | 40%  |
|       | 268   | 285   | 2  | 16 | 15.65-15.72 | 16%    | 38% | 45% | 52% | 58% | 60%  |
|       | 286   | 295   | 2  | 8  | 11.92-11.99 | 12%    | 2%  | 3%  | 3%  | 11% | 20%  |
|       | 286   | 297   | 3  | 10 | 13.51-13.67 | 14%    | 2%  | 4%  | 3%  | 6%  | 14%  |
|       | 304   | 312   | 2  | 7  | 14.45-14.57 | 14%    | 4%  | 7%  | 7%  | 9%  | 14%  |
|       | 313   | 322   | 2  | 8  | 16.11-16.16 | 16%    | 16% | 24% | 33% | 47% | 54%  |
|       | 343   | 365   | 3  | 21 | 10.88-11.09 | 11%    | 6%  | 11% | 17% | 21% | 27%  |
|       | 346   | 365   | 3  | 18 | 9.15-9.19   | 9%     | 5%  | 8%  | 12% | 14% | 15%  |
|       | 371   | 386   | 3  | 12 | 15.41-15.45 | 15%    | 12% | 17% | 23% | 32% | 47%  |
|       | 373   | 386   | 3  | 10 | 15.56-15.60 | 16%    | 14% | 19% | 27% | 36% | 50%  |
|       | 375   | 386   | 3  | 8  | 15.24-15.30 | 15%    | 17% | 24% | 32% | 41% | 51%  |
|       | 375   | 388   | 3  | 10 | 16.26-16.43 | 16%    | 17% | 25% | 34% | 42% | 52%  |
|       | 387   | 402   | 2  | 13 | 16.46-16.50 | 16%    | 8%  | 10% | 13% | 14% | 20%  |

**Table S2.** Relative percentage of global deuteration level of Vps30 (A), Vps15 (B), Vps34 (C), and Vps38 (D). Column labeling: S, starting amino acid; E, ending amino acid; CS, charge state, #D, number of deuterons; RT, retention time. Time course: 0.3 (3 s on ice); 3, 30 and 300 are in seconds.



**Table S3B**

| Vps38 |     |   |    |      |       | %HDX exchange apo |    |    |    |    |    |     |    |
|-------|-----|---|----|------|-------|-------------------|----|----|----|----|----|-----|----|
| S     | E   | z | #D | rt   | i     | 0.3               | sd | 3  | sd | 30 | sd | 300 | sd |
| 24    | 32  | 2 | 7  | 6.5  | 28    | 58                | 2  | 60 | 0  | 63 | 1  | 63  | 1  |
| 33    | 44  | 2 | 9  | 15.8 | 38.5  | 26                | 1  | 27 | 1  | 33 | 1  | 39  | 1  |
| 33    | 45  | 2 | 10 | 17.6 | 39    | 23                | 1  | 24 | 1  | 30 | 1  | 36  | 1  |
| 45    | 54  | 2 | 8  | 14.9 | 49.5  | 21                | 1  | 22 | 0  | 30 | 1  | 44  | 1  |
| 45    | 55  | 2 | 9  | 15.2 | 50    | 34                | 2  | 34 | 0  | 43 | 1  | 45  | 1  |
| 46    | 55  | 2 | 8  | 13.0 | 50.5  | 39                | 1  | 41 | 1  | 49 | 1  | 51  | 1  |
| 55    | 59  | 1 | 3  | 8.7  | 57    | 2                 | 1  | 3  | 0  | 3  | 0  | 6   | 1  |
| 71    | 82  | 2 | 9  | 10.5 | 76.5  | 45                | 2  | 47 | 1  | 54 | 2  | 60  | 2  |
| 86    | 96  | 2 | 8  | 14.1 | 91    | 6                 | 0  | 6  | 0  | 12 | 0  | 20  | 1  |
| 99    | 111 | 3 | 11 | 11.2 | 105   | 29                | 1  | 27 | 1  | 32 | 2  | 37  | 2  |
| 100   | 111 | 2 | 10 | 11.2 | 105.5 | 30                | 1  | 29 | 1  | 33 | 1  | 34  | 1  |
| 185   | 192 | 2 | 6  | 10.7 | 188.5 | 3                 | 0  | 4  | 0  | 5  | 1  | 17  | 1  |
| 191   | 203 | 2 | 11 | 9.4  | 197   | 8                 | 1  | 11 | 0  | 26 | 1  | 49  | 1  |
| 204   | 212 | 2 | 7  | 11.4 | 208   | 21                | 2  | 28 | 1  | 38 | 1  | 50  | 1  |
| 212   | 221 | 2 | 8  | 9.2  | 216.5 | 13                | 2  | 17 | 0  | 33 | 0  | 47  | 0  |
| 222   | 231 | 2 | 8  | 6.7  | 226.5 | 5                 | 0  | 6  | 1  | 13 | 1  | 33  | 1  |
| 222   | 233 | 2 | 10 | 10.5 | 227.5 | 5                 | 2  | 6  | 1  | 9  | 2  | 32  | 2  |
| 253   | 265 | 2 | 11 | 7.3  | 259   | 49                | 1  | 47 | 0  | 50 | 1  | 50  | 1  |
| 253   | 267 | 2 | 13 | 10.0 | 260   | 51                | 1  | 50 | 0  | 52 | 1  | 52  | 1  |
| 286   | 292 | 2 | 5  | 8.3  | 289   | 7                 | 0  | 10 | 2  | 17 | 1  | 34  | 1  |
| 286   | 295 | 2 | 8  | 10.5 | 290.5 | 6                 | 1  | 8  | 1  | 10 | 3  | 19  | 2  |
| 304   | 312 | 2 | 7  | 12.8 | 308   | 8                 | 1  | 11 | 2  | 11 | 0  | 16  | 1  |
| 313   | 322 | 2 | 8  | 14.2 | 317.5 | 29                | 1  | 31 | 1  | 45 | 0  | 59  | 1  |
| 346   | 365 | 3 | 18 | 8.0  | 355.5 | 14                | 0  | 16 | 0  | 22 | 1  | 25  | 1  |
| 373   | 386 | 3 | 10 | 13.6 | 379.5 | 23                | 1  | 25 | 0  | 36 | 0  | 50  | 1  |
| 373   | 388 | 3 | 12 | 14.5 | 380.5 | 25                | 2  | 28 | 1  | 39 | 0  | 50  | 1  |
| 375   | 386 | 2 | 8  | 13.3 | 380.5 | 27                | 1  | 31 | 0  | 42 | 0  | 55  | 1  |
| 375   | 388 | 3 | 10 | 14.2 | 381.5 | 29                | 2  | 32 | 0  | 43 | 1  | 54  | 1  |
| 377   | 386 | 2 | 6  | 13.2 | 381.5 | 34                | 1  | 37 | 0  | 47 | 1  | 60  | 0  |
| 387   | 402 | 2 | 13 | 14.4 | 394.5 | 16                | 0  | 16 | 1  | 20 | 1  | 23  | 1  |
| 403   | 415 | 3 | 11 | 8.8  | 409   | 43                | 2  | 43 | 1  | 51 | 2  | 52  | 1  |

%HDX exchange + liposomes

| 0.3 | sd | 3  | sd | 30 | sd | 300 | sd |
|-----|----|----|----|----|----|-----|----|
| 56  | 1  | 61 | 0  | 63 | 2  | 64  | 2  |
| 25  | 0  | 29 | 0  | 34 | 2  | 41  | 1  |
| 22  | 0  | 26 | 0  | 30 | 1  | 37  | 1  |
| 21  | 0  | 23 | 1  | 30 | 1  | 45  | 0  |
| 34  | 1  | 36 | 1  | 42 | 1  | 45  | 2  |
| 38  | 1  | 41 | 1  | 49 | 1  | 51  | 1  |
| 3   | 1  | 3  | 0  | 4  | 1  | 7   | 2  |
| 42  | 0  | 49 | 1  | 57 | 2  | 65  | 1  |
| 6   | 0  | 7  | 1  | 13 | 1  | 23  | 1  |
| 29  | 0  | 30 | 0  | 35 | 3  | 41  | 3  |
| 31  | 1  | 31 | 0  | 34 | 1  | 38  | 0  |
| 5   | 1  | 7  | 0  | 10 | 0  | 24  | 1  |
| 7   | 1  | 12 | 1  | 26 | 1  | 51  | 1  |
| 22  | 0  | 30 | 1  | 39 | 1  | 52  | 1  |
| 12  | 0  | 18 | 3  | 33 | 1  | 48  | 0  |
| 3   | 0  | 5  | 1  | 12 | 2  | 31  | 2  |
| 5   | 0  | 6  | 1  | 9  | 0  | 29  | 1  |
| 49  | 1  | 49 | 1  | 50 | 1  | 50  | 0  |
| 50  | 0  | 50 | 1  | 52 | 1  | 52  | 1  |
| 7   | 1  | 9  | 1  | 20 | 2  | 37  | 0  |
| 8   | 0  | 10 | 1  | 13 | 3  | 24  | 1  |
| 7   | 0  | 10 | 1  | 12 | 1  | 18  | 0  |
| 31  | 1  | 35 | 2  | 49 | 2  | 63  | 1  |
| 12  | 1  | 15 | 1  | 23 | 1  | 27  | 1  |
| 21  | 1  | 26 | 1  | 36 | 1  | 52  | 0  |
| 22  | 1  | 28 | 1  | 39 | 1  | 51  | 1  |
| 26  | 0  | 31 | 1  | 43 | 1  | 56  | 0  |
| 26  | 0  | 33 | 2  | 43 | 1  | 55  | 1  |
| 33  | 0  | 38 | 1  | 49 | 1  | 62  | 0  |
| 15  | 1  | 16 | 1  | 21 | 1  | 24  | 2  |
| 43  | 0  | 46 | 2  | 51 | 1  | 55  | 1  |

**Table S3C**

| Vps15 |      |   |    |      |        | %HDX exchange apo |    |    |    |    |    |     |    |
|-------|------|---|----|------|--------|-------------------|----|----|----|----|----|-----|----|
| S     | E    | z | #D | rt   | i      | 0.3               | sd | 3  | sd | 30 | sd | 300 | sd |
| 56    | 69   | 3 | 10 | 12.5 | 62.5   | 37                | 2  | 37 | 1  | 46 | 0  | 52  | 1  |
| 77    | 88   | 2 | 9  | 13.1 | 82.5   | 14                | 0  | 16 | 1  | 26 | 1  | 40  | 1  |
| 100   | 109  | 2 | 8  | 5.9  | 104.5  | 8                 | 1  | 11 | 1  | 14 | 0  | 21  | 1  |
| 233   | 243  | 2 | 8  | 14.8 | 238    | 12                | 1  | 15 | 1  | 22 | 2  | 38  | 1  |
| 262   | 272  | 2 | 9  | 8.6  | 267    | 30                | 1  | 31 | 1  | 40 | 1  | 43  | 2  |
| 359   | 377  | 2 | 14 | 15.4 | 368    | 38                | 3  | 38 | 2  | 49 | 3  | 51  | 4  |
| 634   | 640  | 1 | 5  | 13.8 | 637    | 1                 | 0  | 1  | 0  | 1  | 0  | 1   | 0  |
| 761   | 773  | 2 | 10 | 12.3 | 767    | 28                | 2  | 29 | 1  | 35 | 1  | 34  | 1  |
| 786   | 800  | 2 | 13 | 9.3  | 793    | 34                | 2  | 38 | 1  | 48 | 1  | 51  | 1  |
| 858   | 873  | 3 | 14 | 15.2 | 865.5  | 23                | 1  | 26 | 0  | 34 | 0  | 44  | 1  |
| 863   | 873  | 2 | 9  | 14.2 | 868    | 10                | 1  | 11 | 1  | 18 | 1  | 25  | 0  |
| 863   | 875  | 3 | 11 | 12.4 | 869    | 15                | 1  | 17 | 0  | 22 | 0  | 30  | 1  |
| 881   | 910  | 3 | 23 | 12.5 | 895.5  | 64                | 0  | 62 | 0  | 67 | 3  | 67  | 3  |
| 897   | 910  | 2 | 9  | 11.8 | 903.5  | 77                | 2  | 75 | 1  | 79 | 2  | 77  | 3  |
| 909   | 920  | 2 | 9  | 16.4 | 914.5  | 42                | 2  | 49 | 1  | 66 | 1  | 78  | 1  |
| 911   | 920  | 2 | 7  | 15.3 | 915.5  | 34                | 2  | 44 | 0  | 64 | 1  | 78  | 1  |
| 961   | 973  | 2 | 11 | 8.5  | 967    | 32                | 1  | 34 | 1  | 43 | 1  | 46  | 1  |
| 974   | 987  | 2 | 12 | 9.2  | 980.5  | 65                | 1  | 64 | 1  | 67 | 1  | 67  | 1  |
| 1040  | 1048 | 2 | 5  | 11.0 | 1044   | 23                | 0  | 30 | 1  | 52 | 2  | 73  | 1  |
| 1049  | 1057 | 2 | 6  | 10.8 | 1053   | 39                | 1  | 41 | 1  | 56 | 1  | 69  | 1  |
| 1058  | 1071 | 3 | 11 | 9.4  | 1064.5 | 68                | 2  | 68 | 2  | 71 | 2  | 71  | 1  |
| 1059  | 1071 | 3 | 10 | 9.4  | 1065   | 65                | 2  | 65 | 0  | 71 | 2  | 70  | 2  |
| 1076  | 1096 | 2 | 16 | 12.6 | 1086   | 20                | 1  | 22 | 1  | 32 | 1  | 40  | 2  |
| 1097  | 1110 | 2 | 12 | 14.9 | 1103.5 | 12                | 1  | 13 | 0  | 17 | 0  | 22  | 0  |
| 1156  | 1165 | 2 | 8  | 4.8  | 1160.5 | 50                | 2  | 52 | 1  | 58 | 2  | 60  | 2  |
| 1305  | 1314 | 2 | 8  | 14.2 | 1309.5 | 28                | 1  | 31 | 1  | 46 | 2  | 58  | 0  |
| 1341  | 1351 | 2 | 9  | 10.9 | 1346   | 21                | 1  | 22 | 0  | 30 | 0  | 39  | 1  |
| 1352  | 1368 | 2 | 15 | 11.0 | 1360   | 16                | 1  | 20 | 2  | 30 | 1  | 39  | 2  |
| 1406  | 1421 | 3 | 14 | 5.1  | 1413.5 | 34                | 0  | 33 | 1  | 36 | 1  | 36  | 2  |
| 1422  | 1429 | 2 | 6  | 6.2  | 1425.5 | 8                 | 0  | 9  | 1  | 10 | 2  | 17  | 4  |
| 1442  | 1449 | 1 | 6  | 8.7  | 1445.5 | 12                | 2  | 14 | 2  | 15 | 2  | 19  | 3  |

%HDX exchange + liposomes

| 0.3 | sd | 3  | sd | 30 | sd | 300 | sd |
|-----|----|----|----|----|----|-----|----|
| 33  | 3  | 35 | 2  | 42 | 4  | 50  | 3  |
| 14  | 1  | 15 | 0  | 25 | 2  | 41  | 1  |
| 7   | 1  | 12 | 2  | 15 | 2  | 22  | 1  |
| 9   | 2  | 15 | 1  | 20 | 1  | 36  | 1  |
| 29  | 1  | 33 | 2  | 38 | 1  | 45  | 2  |
| 34  | 3  | 34 | 1  | 41 | 3  | 47  | 5  |
| 1   | 0  | 2  | 2  | 1  | 1  | 2   | 1  |
| 25  | 0  | 28 | 1  | 34 | 1  | 38  | 1  |
| 30  | 2  | 37 | 1  | 46 | 2  | 50  | 2  |
| 23  | 1  | 27 | 1  | 37 | 1  | 52  | 1  |
| 6   | 3  | 12 | 1  | 21 | 1  | 32  | 2  |
| 13  | 1  | 18 | 1  | 26 | 1  | 40  | 1  |
| 63  | 1  | 62 | 2  | 66 | 3  | 68  | 3  |
| 78  | 2  | 75 | 1  | 77 | 2  | 78  | 4  |
| 41  | 1  | 49 | 3  | 65 | 2  | 81  | 2  |
| 33  | 1  | 44 | 2  | 64 | 2  | 83  | 2  |
| 32  | 0  | 35 | 2  | 44 | 1  | 47  | 0  |
| 64  | 3  | 63 | 0  | 65 | 1  | 68  | 2  |
| 21  | 2  | 33 | 4  | 51 | 2  | 75  | 4  |
| 36  | 2  | 42 | 1  | 55 | 1  | 68  | 2  |
| 64  | 2  | 66 | 2  | 70 | 2  | 72  | 1  |
| 63  | 2  | 65 | 1  | 70 | 3  | 71  | 1  |
| 19  | 1  | 23 | 1  | 33 | 2  | 41  | 1  |
| 12  | 0  | 13 | 1  | 16 | 1  | 22  | 1  |
| 49  | 3  | 52 | 2  | 55 | 2  | 58  | 2  |
| 30  | 1  | 35 | 1  | 48 | 2  | 61  | 2  |
| 21  | 0  | 24 | 1  | 31 | 2  | 40  | 1  |
| 17  | 1  | 24 | 1  | 31 | 1  | 39  | 2  |
| 33  | 2  | 34 | 1  | 35 | 2  | 37  | 3  |
| 8   | 2  | 9  | 0  | 12 | 1  | 21  | 2  |
| 9   | 1  | 12 | 3  | 13 | 5  | 19  | 2  |



| Table S3D |     | Vps30 |    |      |      |    |    |   | %HDX exchange apo |    |    |    |    |    |     | %HDX exchange + liposomes |     |    |    |    |    |    |
|-----------|-----|-------|----|------|------|----|----|---|-------------------|----|----|----|----|----|-----|---------------------------|-----|----|----|----|----|----|
|           |     | S     | E  | z    | #D   | rt | i  |   | 0.3               | sd | 3  | sd | 30 | sd | 300 | sd                        | 0.3 | sd | 3  | sd | 30 | sd |
| 6         | 16  | 2     | 7  | 13.5 | 11   |    | 23 | 4 | 25                | 1  | 29 | 1  | 40 | 0  | 21  | 1                         | 25  | 1  | 34 | 3  | 44 | 2  |
| 17        | 27  | 2     | 9  | 12.5 | 22   |    | 59 | 4 | 68                | 1  | 77 | 2  | 77 | 2  | 58  | 1                         | 71  | 1  | 78 | 2  | 79 | 1  |
| 19        | 27  | 2     | 7  | 10.1 | 23   |    | 17 | 2 | 19                | 2  | 32 | 1  | 47 | 1  | 19  | 5                         | 28  | 2  | 41 | 1  | 58 | 0  |
| 32        | 39  | 1     | 6  | 8.9  | 35.5 |    | 87 | 2 | 86                | 0  | 89 | 1  | 86 | 2  | 85  | 0                         | 86  | 1  | 85 | 2  | 84 | 2  |
| 40        | 62  | 3     | 19 | 10.2 | 51   |    | 69 | 0 | 68                | 1  | 73 | 2  | 75 | 1  | 68  | 0                         | 70  | 1  | 74 | 2  | 76 | 1  |
| 40        | 76  | 5     | 33 | 11.6 | 58   |    | 51 | 1 | 52                | 0  | 60 | 2  | 67 | 1  | 51  | 0                         | 54  | 1  | 62 | 2  | 69 | 1  |
| 42        | 62  | 3     | 17 | 10.2 | 52   |    | 69 | 1 | 68                | 0  | 74 | 2  | 76 | 1  | 69  | 0                         | 71  | 1  | 75 | 2  | 78 | 1  |
| 43        | 62  | 3     | 16 | 10.3 | 52.5 |    | 72 | 2 | 71                | 0  | 77 | 1  | 79 | 1  | 72  | 0                         | 74  | 0  | 78 | 3  | 81 | 2  |
| 49        | 76  | 4     | 24 | 11.3 | 62.5 |    | 40 | 1 | 42                | 0  | 52 | 1  | 62 | 1  | 40  | 1                         | 45  | 1  | 55 | 2  | 64 | 1  |
| 51        | 76  | 4     | 22 | 11.5 | 63.5 |    | 41 | 1 | 42                | 1  | 53 | 1  | 65 | 1  | 40  | 0                         | 45  | 1  | 55 | 2  | 66 | 1  |
| 63        | 69  | 2     | 5  | 8.3  | 66   |    | 10 | 2 | 12                | 1  | 17 | 1  | 33 | 1  | 8   | 2                         | 11  | 3  | 20 | 3  | 37 | 1  |
| 63        | 73  | 3     | 9  | 7.5  | 68   |    | 40 | 1 | 43                | 1  | 54 | 1  | 69 | 1  | 40  | 1                         | 46  | 2  | 57 | 1  | 73 | 2  |
| 63        | 76  | 3     | 12 | 11.2 | 69.5 |    | 41 | 1 | 43                | 1  | 55 | 1  | 67 | 1  | 41  | 0                         | 46  | 1  | 57 | 2  | 71 | 1  |
| 77        | 81  | 1     | 3  | 8.5  | 79   |    | 43 | 4 | 54                | 0  | 63 | 2  | 62 | 1  | 43  | 0                         | 56  | 3  | 63 | 1  | 64 | 1  |
| 82        | 86  | 1     | 3  | 10.6 | 84   |    | 20 | 3 | 37                | 0  | 63 | 2  | 71 | 1  | 19  | 1                         | 41  | 6  | 64 | 2  | 71 | 1  |
| 86        | 97  | 2     | 10 | 11.8 | 91.5 |    | 17 | 0 | 18                | 0  | 26 | 1  | 32 | 1  | 18  | 1                         | 20  | 1  | 27 | 1  | 33 | 1  |
| 87        | 97  | 2     | 9  | 8.7  | 92   |    | 22 | 0 | 22                | 1  | 27 | 1  | 28 | 2  | 22  | 1                         | 23  | 1  | 27 | 1  | 29 | 1  |
| 98        | 130 | 4     | 31 | 5.0  | 114  |    | 60 | 0 | 59                | 0  | 61 | 3  | 60 | 1  | 60  | 0                         | 61  | 1  | 62 | 1  | 62 | 1  |
| 131       | 138 | 2     | 6  | 5.0  | 135  |    | 23 | 0 | 24                | 6  | 24 | 1  | 25 | 4  | 24  | 3                         | 24  | 3  | 24 | 5  | 27 | 4  |
| 131       | 139 | 2     | 7  | 4.9  | 135  |    | 32 | 1 | 31                | 1  | 34 | 1  | 32 | 2  | 33  | 1                         | 32  | 0  | 32 | 3  | 34 | 1  |
| 153       | 163 | 2     | 9  | 6.0  | 158  |    | 85 | 2 | 83                | 1  | 85 | 1  | 85 | 1  | 84  | 1                         | 84  | 0  | 85 | 1  | 86 | 1  |
| 153       | 168 | 2     | 14 | 12.8 | 161  |    | 74 | 0 | 76                | 1  | 82 | 1  | 82 | 2  | 73  | 3                         | 79  | 0  | 83 | 3  | 83 | 2  |
| 164       | 168 | 1     | 3  | 12.3 | 166  |    | 53 | 6 | 65                | 2  | 87 | 1  | 90 | 2  | 52  | 1                         | 70  | 2  | 88 | 3  | 91 | 1  |
| 188       | 210 | 4     | 21 | 12.6 | 199  |    | 4  | 1 | 5                 | 0  | 9  | 1  | 23 | 1  | 4   | 1                         | 5   | 0  | 9  | 1  | 22 | 1  |
| 194       | 210 | 2     | 15 | 10.6 | 202  |    | 4  | 1 | 4                 | 0  | 7  | 1  | 18 | 2  | 4   | 1                         | 5   | 0  | 8  | 1  | 24 | 4  |
| 194       | 210 | 3     | 15 | 10.6 | 202  |    | 4  | 1 | 5                 | 0  | 7  | 1  | 21 | 2  | 4   | 1                         | 5   | 0  | 8  | 1  | 24 | 0  |
| 201       | 210 | 2     | 8  | 9.7  | 206  |    | 3  | 1 | 4                 | 0  | 9  | 1  | 24 | 1  | 4   | 0                         | 5   | 0  | 10 | 2  | 27 | 1  |
| 211       | 223 | 2     | 11 | 6.2  | 217  |    | 59 | 1 | 60                | 1  | 68 | 1  | 69 | 2  | 56  | 0                         | 62  | 3  | 68 | 3  | 70 | 1  |
| 211       | 247 | 5     | 35 | 8.2  | 229  |    | 51 | 1 | 53                | 1  | 56 | 1  | 57 | 1  | 51  | 0                         | 54  | 1  | 58 | 1  | 59 | 0  |
| 211       | 251 | 6     | 39 | 11.1 | 231  |    | 43 | 1 | 46                | 1  | 53 | 1  | 55 | 1  | 44  | 1                         | 49  | 1  | 54 | 1  | 59 | 1  |
| 215       | 247 | 6     | 31 | 8.1  | 231  |    | 50 | 1 | 53                | 1  | 55 | 1  | 55 | 1  | 51  | 1                         | 54  | 1  | 56 | 1  | 57 | 1  |
| 215       | 251 | 5     | 35 | 11.3 | 233  |    | 43 | 1 | 46                | 1  | 53 | 1  | 55 | 1  | 44  | 0                         | 48  | 1  | 54 | 0  | 57 | 0  |
| 266       | 288 | 3     | 21 | 9.4  | 277  |    | 24 | 2 | 33                | 1  | 57 | 1  | 70 | 1  | 22  | 1                         | 34  | 4  | 56 | 1  | 72 | 1  |
| 289       | 293 | 1     | 3  | 6.9  | 291  |    | 27 | 2 | 34                | 1  | 52 | 2  | 70 | 1  | 29  | 2                         | 41  | 3  | 58 | 0  | 73 | 1  |
| 297       | 327 | 5     | 29 | 14.7 | 312  |    | 11 | 1 | 14                | 0  | 22 | 1  | 44 | 3  | 10  | 1                         | 14  | 1  | 22 | 1  | 43 | 1  |
| 312       | 327 | 3     | 14 | 13.8 | 320  |    | 22 | 2 | 26                | 1  | 37 | 1  | 57 | 0  | 23  | 2                         | 30  | 4  | 44 | 0  | 59 | 1  |
| 318       | 327 | 2     | 8  | 11.5 | 323  |    | 44 | 0 | 43                | 0  | 45 | 1  | 47 | 1  | 44  | 0                         | 44  | 1  | 46 | 1  | 47 | 1  |
| 327       | 340 | 2     | 11 | 11.5 | 334  |    | 18 | 1 | 21                | 5  | 24 | 3  | 32 | 1  | 18  | 1                         | 19  | 0  | 23 | 1  | 33 | 1  |
| 327       | 357 | 4     | 26 | 14.1 | 342  |    | 17 | 1 | 19                | 1  | 25 | 0  | 36 | 1  | 17  | 0                         | 19  | 1  | 24 | 2  | 34 | 1  |
| 328       | 357 | 4     | 25 | 13.6 | 343  |    | 17 | 0 | 18                | 0  | 25 | 1  | 35 | 1  | 16  | 0                         | 18  | 1  | 25 | 1  | 35 | 1  |
| 367       | 378 | 2     | 10 | 11.3 | 373  |    | 25 | 1 | 25                | 0  | 33 | 0  | 50 | 1  | 24  | 1                         | 27  | 1  | 34 | 1  | 52 | 0  |
| 368       | 378 | 2     | 9  | 11.3 | 373  |    | 27 | 1 | 28                | 0  | 35 | 1  | 53 | 1  | 27  | 0                         | 29  | 1  | 37 | 1  | 55 | 1  |
| 369       | 378 | 2     | 8  | 11.1 | 374  |    | 30 | 1 | 31                | 0  | 39 | 1  | 58 | 1  | 30  | 0                         | 32  | 0  | 40 | 1  | 60 | 1  |
| 385       | 389 | 1     | 3  | 14.2 | 387  |    | 26 | 1 | 28                | 1  | 36 | 1  | 41 | 0  | 23  | 2                         | 30  | 2  | 37 | 2  | 42 | 1  |
| 390       | 401 | 2     | 10 | 4.8  | 396  |    | 51 | 1 | 51                | 1  | 54 | 1  | 59 | 0  | 49  | 0                         | 51  | 3  | 54 | 0  | 57 | 2  |
| 390       | 413 | 3     | 21 | 9.2  | 402  |    | 54 | 0 | 52                | 1  | 56 | 1  | 58 | 1  | 53  | 0                         | 54  | 0  | 57 | 1  | 59 | 1  |
| 414       | 419 | 1     | 3  | 14.4 | 417  |    | 4  | 1 | 4                 | 0  | 4  | 1  | 5  | 2  | 5   | 1                         | 5   | 0  | 8  | 2  | 11 | 1  |
| 424       | 443 | 4     | 18 | 11.3 | 434  |    | 41 | 1 | 41                | 1  | 46 | 1  | 51 | 1  | 31  | 1                         | 35  | 2  | 46 | 1  | 50 | 1  |
| 425       | 444 | 4     | 18 | 10.9 | 435  |    | 34 | 1 | 34                | 1  | 39 | 1  | 42 | 1  | 27  | 0                         | 31  | 1  | 37 | 1  | 43 | 0  |
| 427       | 441 | 4     | 13 | 7.7  | 434  |    | 30 | 0 | 30                | 1  | 36 | 0  | 41 | 1  | 23  | 1                         | 27  | 1  | 33 | 1  | 40 | 2  |
| 427       | 443 | 4     | 15 | 7.8  | 435  |    | 25 | 0 | 26                | 1  | 31 | 1  | 36 | 1  | 19  | 1                         | 23  | 1  | 28 | 1  | 35 | 1  |
| 427       | 444 | 4     | 16 | 9.6  | 436  |    | 21 | 1 | 22                | 1  | 28 | 0  | 32 | 1  | 17  | 0                         | 20  | 2  | 26 | 1  | 33 | 2  |
| 445       | 449 | 1     | 3  | 8.4  | 447  |    | 2  | 0 | 2                 | 1  | 3  | 0  | 7  | 1  | 2   | 0                         | 3   | 1  | 5  | 1  | 10 | 0  |
| 450       | 456 | 1     | 5  | 5.3  | 453  |    | 34 | 1 | 37                | 0  | 43 | 0  | 58 | 0  | 32  | 0                         | 38  | 1  | 45 | 1  | 59 | 1  |
| 451       | 456 | 1     | 4  | 5.2  | 454  |    | 38 | 2 | 42                | 1  | 50 | 2  | 64 | 0  | 35  | 1                         | 45  | 3  | 50 | 4  | 66 | 2  |
| 451       | 457 | 2     | 5  | 5.2  | 454  |    | 36 | 2 | 39                | 1  | 45 | 2  | 59 | 1  | 33  | 1                         | 41  | 1  | 46 | 3  | 62 | 2  |
| 485       | 490 | 1     | 4  | 14.2 | 488  |    | 77 | 2 | 77                | 0  | 80 | 2  | 81 | 1  | 71  | 1                         | 78  | 2  | 82 | 0  | 84 | 1  |
| 487       | 502 | 3     | 13 | 14.0 | 495  |    | 31 | 1 | 33                | 0  | 40 | 1  | 42 | 2  | 28  | 0                         | 34  | 2  | 41 | 2  | 46 | 1  |
| 491       | 502 | 3     | 10 | 10.5 | 497  |    | 31 | 2 | 34                | 0  | 43 | 0  | 47 | 0  | 29  | 0                         | 35  | 1  | 44 | 1  | 48 | 1  |
| 491       | 503 | 2     | 11 | 9.6  | 497  |    | 34 | 2 | 37                | 1  | 45 | 1  | 48 | 1  | 31  | 0                         | 37  | 2  | 45 | 1  | 49 | 1  |
| 503       | 513 | 2     | 8  | 7.7  | 508  |    | 28 | 1 | 29                | 1  | 33 | 1  | 40 | 1  | 27  | 1                         | 29  | 2  | 33 | 1  | 38 | 1  |
| 504       | 513 | 2     | 7  | 7.4  | 509  |    | 30 | 1 | 31                | 1  | 36 | 1  | 44 | 0  | 28  | 0                         | 31  | 2  | 35 | 0  | 39 | 1  |
| 522       | 531 | 2     | 8  | 15.3 | 527  |    | 1  | 0 | 2                 | 0  | 5  | 0  | 11 | 0  | 1   | 0                         | 2   | 0  | 6  | 0  | 13 | 0  |
| 522       | 532 | 2     | 9  | 17.6 | 527  |    | 2  | 1 | 3                 | 1  | 8  | 1  | 16 | 2  | 2   | 0                         | 4   | 1  | 7  | 0  | 17 | 0  |
| 532       | 536 | 1     | 3  | 10.1 | 534  |    | 58 | 3 | 67                | 3  | 82 | 1  | 86 | 2  | 59  | 3                         | 69  | 1  | 85 | 2  | 88 | 2  |

**Table S3.** Relative percentage of global deuteration level of Vps34 (A), Vps38 (B), Vps15 (C), and Vps30 (D) in presence and in absence of liposomes. Column labels as in Table S2.

**Table S4A**

| ScVps34 | %HDX exchange apo |   |    |      |       |     |    | %HDX exchange +NB 8780 |    |
|---------|-------------------|---|----|------|-------|-----|----|------------------------|----|
| S       | E                 | z | #D | rt   | i     | 0.3 | sd | 0.3                    | sd |
| 2       | 8                 | 1 | 5  | 12.9 | 5     | 27  | 1  | 29                     | 2  |
| 44      | 55                | 2 | 9  | 12.8 | 49.5  | 10  | 0  | 11                     | 1  |
| 61      | 73                | 3 | 11 | 9.0  | 67    | 3   | 0  | 5                      | 0  |
| 63      | 73                | 3 | 9  | 10.1 | 68    | 30  | 0  | 30                     | 1  |
| 74      | 87                | 3 | 10 | 11.6 | 80.5  | 16  | 1  | 18                     | 2  |
| 74      | 89                | 3 | 12 | 13.1 | 81.5  | 9   | 0  | 11                     | 2  |
| 74      | 90                | 3 | 13 | 13.8 | 82    | 8   | 0  | 9                      | 1  |
| 74      | 91                | 3 | 14 | 15.5 | 82.5  | 11  | 1  | 11                     | 1  |
| 92      | 107               | 4 | 13 | 12.8 | 99.5  | 5   | 0  | 5                      | 1  |
| 112     | 123               | 2 | 9  | 15.0 | 117.5 | 3   | 0  | 4                      | 1  |
| 112     | 125               | 2 | 11 | 15.9 | 118.5 | 3   | 1  | 4                      | 1  |
| 135     | 144               | 2 | 8  | 14.4 | 139.5 | 23  | 0  | 24                     | 1  |
| 138     | 144               | 2 | 5  | 8.8  | 141   | 4   | 0  | 6                      | 0  |
| 138     | 154               | 4 | 15 | 10.5 | 146   | 5   | 0  | 5                      | 1  |
| 145     | 154               | 3 | 8  | 9.7  | 149.5 | 8   | 0  | 9                      | 1  |
| 155     | 166               | 2 | 10 | 7.7  | 160.5 | 39  | 0  | 40                     | 2  |
| 155     | 173               | 3 | 17 | 10.6 | 164   | 22  | 0  | 23                     | 2  |
| 155     | 174               | 3 | 18 | 12.7 | 164.5 | 21  | 1  | 22                     | 2  |
| 174     | 180               | 2 | 4  | 15.3 | 177   | 38  | 1  | 37                     | 0  |
| 174     | 182               | 2 | 6  | 14.6 | 178   | 25  | 1  | 25                     | 2  |
| 175     | 180               | 2 | 3  | 14.2 | 177.5 | 34  | 1  | 34                     | 0  |
| 181     | 201               | 4 | 18 | 8.5  | 191   | 38  | 0  | 41                     | 2  |
| 183     | 201               | 4 | 16 | 7.3  | 192   | 40  | 0  | 41                     | 1  |
| 209     | 213               | 1 | 3  | 13.9 | 211   | 22  | 1  | 23                     | 1  |
| 218     | 223               | 2 | 4  | 8.7  | 220.5 | 37  | 2  | 37                     | 1  |
| 218     | 225               | 2 | 6  | 8.0  | 221.5 | 50  | 1  | 50                     | 1  |
| 224     | 241               | 2 | 14 | 10.3 | 232.5 | 54  | 0  | 55                     | 2  |
| 228     | 241               | 2 | 10 | 9.1  | 234.5 | 60  | 1  | 61                     | 1  |
| 242     | 264               | 5 | 19 | 9.4  | 253   | 31  | 1  | 31                     | 1  |
| 265     | 293               | 4 | 24 | 10.0 | 279   | 24  | 0  | 26                     | 1  |
| 280     | 293               | 3 | 12 | 5.2  | 286.5 | 37  | 0  | 38                     | 1  |
| 294     | 307               | 3 | 11 | 7.0  | 300.5 | 38  | 2  | 39                     | 1  |
| 294     | 307               | 4 | 11 | 7.0  | 300.5 | 38  | 2  | 38                     | 2  |
| 294     | 319               | 4 | 21 | 9.4  | 306.5 | 24  | 0  | 25                     | 1  |
| 294     | 319               | 5 | 21 | 9.4  | 306.5 | 24  | 0  | 25                     | 2  |
| 294     | 332               | 6 | 34 | 9.6  | 313   | 13  | 1  | 14                     | 1  |
| 320     | 332               | 4 | 11 | 9.1  | 326   | 1   | 0  | 2                      | 0  |
| 333     | 344               | 3 | 10 | 8.7  | 338.5 | 6   | 0  | 7                      | 0  |
| 345     | 350               | 1 | 4  | 8.3  | 347.5 | 47  | 1  | 47                     | 1  |
| 351     | 359               | 2 | 7  | 6.8  | 355   | 14  | 0  | 14                     | 0  |
| 376     | 385               | 2 | 8  | 12.9 | 380.5 | 40  | 0  | 39                     | 1  |
| 376     | 387               | 2 | 10 | 13.1 | 381.5 | 40  | 0  | 44                     | 6  |
| 376     | 389               | 2 | 12 | 11.3 | 382.5 | 37  | 0  | 36                     | 0  |
| 386     | 405               | 4 | 18 | 9.6  | 395.5 | 12  | 0  | 4                      | 0  |
| 388     | 405               | 4 | 16 | 8.5  | 396.5 | 9   | 0  | 2                      | 0  |
| 391     | 406               | 4 | 14 | 8.8  | 398.5 | 11  | 0  | 2                      | 0  |
| 408     | 412               | 1 | 3  | 10.3 | 410   | 0   | 0  | 1                      | 0  |
| 417     | 421               | 1 | 3  | 5.9  | 419   | 86  | 0  | 83                     | 1  |
| 420     | 430               | 2 | 9  | 9.6  | 425   | 58  | 0  | 59                     | 1  |
| 431     | 447               | 2 | 15 | 11.8 | 439   | 69  | 0  | 70                     | 2  |
| 435     | 447               | 2 | 11 | 10.0 | 441   | 59  | 1  | 61                     | 1  |
| 448     | 464               | 2 | 15 | 8.5  | 456   | 60  | 0  | 60                     | 2  |
| 448     | 473               | 4 | 24 | 9.7  | 460.5 | 58  | 0  | 59                     | 2  |
| 449     | 464               | 3 | 14 | 8.6  | 456.5 | 62  | 0  | 62                     | 1  |
| 474     | 483               | 2 | 7  | 16.0 | 478.5 | 36  | 1  | 33                     | 1  |
| 474     | 484               | 2 | 8  | 17.6 | 479   | 31  | 1  | 28                     | 1  |
| 485     | 497               | 3 | 10 | 9.8  | 491   | 2   | 0  | 3                      | 1  |
| 501     | 512               | 2 | 9  | 9.2  | 506.5 | 18  | 0  | 18                     | 1  |
| 503     | 512               | 2 | 7  | 8.3  | 507.5 | 22  | 1  | 22                     | 1  |
| 503     | 516               | 2 | 11 | 12.7 | 509.5 | 15  | 0  | 15                     | 1  |
| 520     | 533               | 3 | 12 | 8.2  | 526.5 | 12  | 0  | 12                     | 0  |
| 534     | 540               | 2 | 5  | 10.7 | 537   | 5   | 0  | 5                      | 1  |
| 546     | 561               | 4 | 14 | 8.0  | 553.5 | 37  | 1  | 36                     | 1  |
| 547     | 561               | 4 | 13 | 7.1  | 554   | 36  | 2  | 35                     | 1  |
| 548     | 561               | 4 | 12 | 6.6  | 554.5 | 33  | 1  | 32                     | 0  |
| 562     | 581               | 4 | 16 | 10.7 | 571.5 | 4   | 0  | 5                      | 0  |
| 562     | 588               | 3 | 21 | 12.7 | 575   | 2   | 0  | 3                      | 1  |
| 566     | 581               | 4 | 12 | 9.6  | 573.5 | 4   | 0  | 6                      | 2  |
| 569     | 588               | 3 | 14 | 12.2 | 578.5 | 4   | 0  | 5                      | 1  |
| 582     | 588               | 1 | 4  | 12.1 | 585   | 2   | 1  | 3                      | 1  |
| 589     | 599               | 2 | 8  | 9.3  | 594   | 35  | 0  | 35                     | 1  |
| 589     | 611               | 3 | 19 | 13.6 | 600   | 26  | 0  | 25                     | 2  |
| 591     | 611               | 3 | 17 | 13.3 | 601   | 27  | 0  | 27                     | 2  |
| 600     | 611               | 2 | 9  | 13.1 | 605.5 | 19  | 0  | 20                     | 1  |
| 612     | 623               | 2 | 9  | 13.0 | 617.5 | 16  | 0  | 17                     | 1  |
| 624     | 634               | 2 | 9  | 8.8  | 629   | 7   | 0  | 8                      | 1  |
| 624     | 634               | 3 | 9  | 8.7  | 629   | 9   | 1  | 9                      | 2  |
| 635     | 641               | 1 | 5  | 13.5 | 638   | 0   | 0  | 1                      | 0  |
| 642     | 653               | 2 | 10 | 11.4 | 647.5 | 5   | 1  | 5                      | 1  |
| 646     | 653               | 2 | 6  | 8.6  | 649.5 | 10  | 0  | 9                      | 1  |
| 654     | 671               | 2 | 14 | 10.7 | 662.5 | 5   | 0  | 7                      | 1  |
| 654     | 678               | 3 | 20 | 13.5 | 666   | 4   | 0  | 6                      | 0  |
| 679     | 689               | 2 | 9  | 11.8 | 684   | 22  | 1  | 22                     | 0  |
| 679     | 690               | 2 | 10 | 11.5 | 684.5 | 22  | 2  | 22                     | 2  |
| 721     | 737               | 3 | 15 | 15.4 | 729   | 6   | 0  | 7                      | 0  |
| 727     | 737               | 2 | 9  | 11.6 | 732   | 7   | 0  | 7                      | 1  |
| 738     | 750               | 3 | 10 | 12.9 | 744   | 1   | 0  | 2                      | 0  |
| 751     | 773               | 3 | 15 | 13.9 | 762   | 18  | 0  | 18                     | 1  |
| 751     | 774               | 3 | 16 | 14.2 | 762.5 | 17  | 0  | 18                     | 1  |
| 775     | 782               | 1 | 6  | 5.8  | 778.5 | 61  | 0  | 60                     | 2  |
| 792     | 803               | 3 | 10 | 10.3 | 797.5 | 5   | 0  | 7                      | 0  |
| 792     | 807               | 3 | 14 | 14.3 | 799.5 | 4   | 1  | 5                      | 1  |
| 811     | 828               | 2 | 14 | 12.3 | 819.5 | 5   | 0  | 6                      | 1  |
| 812     | 828               | 2 | 13 | 12.1 | 820   | 5   | 0  | 6                      | 1  |
| 829     | 838               | 3 | 8  | 9.5  | 833.5 | 24  | 0  | 25                     | 0  |
| 839     | 850               | 2 | 10 | 11.2 | 844.5 | 6   | 0  | 7                      | 0  |
| 851     | 856               | 1 | 4  | 5.7  | 853.5 | 24  | 1  | 24                     | 0  |
| 851     | 871               | 3 | 18 | 15.8 | 861   | 61  | 2  | 61                     | 2  |
| 857     | 872               | 2 | 13 | 15.0 | 864.5 | 68  | 0  | 68                     | 2  |
| 860     | 872               | 3 | 11 | 11.1 | 866   | 54  | 0  | 53                     | 2  |

**Table S4B**

| ScVps38 |     | %HDX exchange apo |    |      |     |     |    | %HDX exchange +NB8780 |    |
|---------|-----|-------------------|----|------|-----|-----|----|-----------------------|----|
| S       | E   | z                 | #D | rt   | i   | 0.3 | SD | 0.3                   | SD |
| 24      | 32  | 2                 | 7  | 6.7  | 28  | 55  | 0  | 55                    | 2  |
| 33      | 44  | 2                 | 9  | 15.3 | 39  | 20  | 1  | 21                    | 2  |
| 33      | 45  | 2                 | 10 | 17.1 | 39  | 18  | 0  | 18                    | 1  |
| 45      | 54  | 2                 | 8  | 13.8 | 50  | 36  | 2  | 34                    | 1  |
| 45      | 55  | 2                 | 9  | 15.0 | 50  | 31  | 1  | 30                    | 1  |
| 46      | 55  | 2                 | 8  | 12.7 | 51  | 32  | 0  | 33                    | 0  |
| 55      | 59  | 1                 | 3  | 8.4  | 57  | 2   | 0  | 3                     | 0  |
| 71      | 81  | 2                 | 8  | 8.8  | 76  | 44  | 1  | 45                    | 1  |
| 71      | 82  | 2                 | 9  | 10.1 | 77  | 37  | 1  | 38                    | 1  |
| 86      | 96  | 2                 | 8  | 13.8 | 91  | 4   | 0  | 5                     | 1  |
| 99      | 111 | 3                 | 11 | 10.8 | 105 | 30  | 0  | 31                    | 1  |
| 117     | 129 | 2                 | 10 | 11.9 | 123 | 19  | 1  | 20                    | 1  |
| 185     | 192 | 2                 | 6  | 10.2 | 189 | 1   | 0  | 2                     | 0  |
| 185     | 203 | 3                 | 17 | 11.4 | 194 | 4   | 0  | 5                     | 0  |
| 191     | 203 | 2                 | 11 | 9.0  | 197 | 4   | 0  | 4                     | 0  |
| 193     | 203 | 2                 | 9  | 7.5  | 198 | 3   | 0  | 4                     | 0  |
| 204     | 212 | 2                 | 7  | 10.9 | 208 | 12  | 1  | 12                    | 1  |
| 222     | 231 | 2                 | 8  | 6.8  | 227 | 4   | 0  | 5                     | 1  |
| 222     | 233 | 2                 | 10 | 10.1 | 228 | 2   | 0  | 3                     | 0  |
| 253     | 265 | 2                 | 11 | 7.2  | 259 | 49  | 0  | 49                    | 1  |
| 253     | 267 | 2                 | 13 | 9.6  | 260 | 52  | 0  | 52                    | 1  |
| 286     | 292 | 2                 | 5  | 7.9  | 289 | 4   | 0  | 5                     | 0  |
| 286     | 295 | 2                 | 8  | 10.1 | 291 | 3   | 0  | 4                     | 0  |
| 304     | 312 | 2                 | 7  | 12.4 | 308 | 6   | 0  | 7                     | 1  |
| 346     | 365 | 3                 | 18 | 7.6  | 356 | 10  | 0  | 11                    | 1  |
| 373     | 386 | 3                 | 10 | 13.4 | 380 | 17  | 0  | 18                    | 1  |
| 375     | 386 | 3                 | 8  | 13.1 | 381 | 20  | 1  | 22                    | 1  |
| 375     | 388 | 3                 | 10 | 14.0 | 382 | 22  | 2  | 22                    | 1  |
| 387     | 402 | 2                 | 13 | 14.1 | 395 | 11  | 0  | 12                    | 1  |
| 403     | 415 | 3                 | 11 | 8.4  | 409 | 40  | 0  | 42                    | 0  |

**Table S4C**

| Vps15 |      | %HDX exchange apo |    |      |      |     |    | %HDX exchange + NB 8780 |    |
|-------|------|-------------------|----|------|------|-----|----|-------------------------|----|
| S     | E    | z                 | #D | rt   | i    | 0.3 | SD | 0.3                     | SD |
| 25    | 33   | 2                 | 7  | 10.1 | 29   | 16  | 1  | 16                      | 0  |
| 39    | 50   | 2                 | 9  | 7.4  | 44.5 | 3   | 0  | 6                       | 1  |
| 56    | 69   | 3                 | 10 | 12.2 | 62.5 | 31  | 0  | 31                      | 1  |
| 77    | 88   | 2                 | 9  | 12.8 | 82.5 | 11  | 0  | 11                      | 1  |
| 78    | 88   | 2                 | 8  | 11.2 | 83   | 12  | 0  | 13                      | 1  |
| 92    | 99   | 2                 | 6  | 6.5  | 95.5 | 28  | 0  | 30                      | 1  |
| 100   | 109  | 3                 | 8  | 6.5  | 105  | 3   | 0  | 5                       | 1  |
| 233   | 243  | 2                 | 8  | 14.4 | 238  | 7   | 0  | 8                       | 2  |
| 233   | 246  | 2                 | 11 | 15.1 | 240  | 7   | 0  | 8                       | 1  |
| 247   | 261  | 3                 | 13 | 10.7 | 254  | 14  | 0  | 14                      | 1  |
| 359   | 377  | 2                 | 14 | 14.9 | 368  | 36  | 1  | 35                      | 1  |
| 540   | 551  | 2                 | 10 | 15.1 | 546  | 11  | 1  | 10                      | 1  |
| 568   | 577  | 2                 | 8  | 7.2  | 573  | 61  | 3  | 63                      | 3  |
| 601   | 610  | 2                 | 7  | 14.8 | 606  | 24  | 1  | 24                      | 1  |
| 634   | 640  | 1                 | 5  | 13.5 | 637  | 0   | 0  | 1                       | 0  |
| 761   | 773  | 2                 | 10 | 11.9 | 767  | 22  | 0  | 23                      | 1  |
| 786   | 800  | 2                 | 13 | 8.9  | 793  | 29  | 0  | 28                      | 1  |
| 858   | 873  | 3                 | 14 | 14.9 | 866  | 18  | 1  | 18                      | 1  |
| 858   | 875  | 3                 | 16 | 13.6 | 867  | 21  | 1  | 21                      | 0  |
| 909   | 920  | 2                 | 9  | 15.9 | 915  | 33  | 0  | 33                      | 2  |
| 911   | 920  | 2                 | 7  | 15.0 | 916  | 24  | 0  | 25                      | 1  |
| 961   | 973  | 2                 | 11 | 8.1  | 967  | 28  | 1  | 28                      | 1  |
| 974   | 987  | 2                 | 12 | 8.7  | 981  | 66  | 0  | 67                      | 1  |
| 1040  | 1048 | 2                 | 5  | 10.7 | 1044 | 10  | 0  | 11                      | 1  |
| 1049  | 1057 | 2                 | 6  | 10.4 | 1053 | 27  | 1  | 28                      | 1  |
| 1058  | 1071 | 3                 | 11 | 8.8  | 1065 | 64  | 1  | 67                      | 1  |
| 1059  | 1071 | 3                 | 10 | 9.0  | 1065 | 60  | 0  | 60                      | 2  |
| 1076  | 1096 | 2                 | 16 | 12.2 | 1086 | 13  | 0  | 14                      | 1  |
| 1097  | 1110 | 2                 | 12 | 14.6 | 1104 | 10  | 0  | 11                      | 1  |
| 1144  | 1155 | 2                 | 10 | 11.5 | 1150 | 3   | 1  | 4                       | 1  |
| 1156  | 1164 | 2                 | 7  | 6.8  | 1160 | 14  | 0  | 14                      | 1  |
| 1156  | 1165 | 2                 | 8  | 4.6  | 1161 | 47  | 2  | 48                      | 1  |
| 1316  | 1338 | 3                 | 19 | 15.0 | 1327 | 27  | 1  | 26                      | 2  |
| 1341  | 1351 | 2                 | 9  | 10.1 | 1346 | 58  | 1  | 59                      | 2  |
| 1352  | 1368 | 2                 | 15 | 10.6 | 1360 | 11  | 0  | 12                      | 1  |
| 1375  | 1389 | 3                 | 12 | 9.9  | 1382 | 45  | 0  | 45                      | 1  |
| 1406  | 1421 | 3                 | 14 | 5.9  | 1414 | 33  | 1  | 34                      | 1  |
| 1422  | 1429 | 2                 | 6  | 6.6  | 1426 | 4   | 0  | 5                       | 0  |
| 1435  | 1441 | 1                 | 4  | 12.1 | 1438 | 8   | 1  | 9                       | 1  |
| 1442  | 1449 | 1                 | 6  | 8.4  | 1446 | 6   | 1  | 7                       | 1  |

**Table S4D**

| ScVps30 |     |   |    | %HDX exchange apo |       |     |    | %HDX exchange +NB 8780 |    |  |  |
|---------|-----|---|----|-------------------|-------|-----|----|------------------------|----|--|--|
| S       | E   | z | #D | rt                | i     | 0.3 | sd | 0.3                    | sd |  |  |
| 2       | 16  | 2 | 11 | 12.6              | 9     | 11  | 0  | 13                     | 1  |  |  |
| 6       | 16  | 2 | 7  | 13.2              | 11    | 17  | 0  | 18                     | 1  |  |  |
| 17      | 27  | 2 | 9  | 12.1              | 22    | 46  | 2  | 47                     | 2  |  |  |
| 20      | 27  | 2 | 6  | 8.6               | 23.5  | 10  | 0  | 9                      | 0  |  |  |
| 32      | 39  | 1 | 6  | 8.5               | 35.5  | 84  | 1  | 84                     | 2  |  |  |
| 40      | 62  | 3 | 19 | 9.8               | 51    | 66  | 0  | 65                     | 2  |  |  |
| 40      | 76  | 5 | 33 | 11.2              | 58    | 47  | 1  | 46                     | 2  |  |  |
| 49      | 62  | 3 | 10 | 9.1               | 55.5  | 55  | 0  | 56                     | 1  |  |  |
| 49      | 76  | 4 | 24 | 11.0              | 62.5  | 35  | 0  | 35                     | 2  |  |  |
| 63      | 69  | 2 | 5  | 7.9               | 66    | 4   | 0  | 5                      | 0  |  |  |
| 63      | 73  | 3 | 9  | 7.3               | 68    | 34  | 0  | 34                     | 1  |  |  |
| 63      | 76  | 2 | 12 | 10.8              | 69.5  | 36  | 0  | 37                     | 1  |  |  |
| 77      | 81  | 1 | 3  | 8.0               | 79    | 38  | 1  | 38                     | 0  |  |  |
| 82      | 86  | 1 | 3  | 10.3              | 84    | 9   | 1  | 11                     | 0  |  |  |
| 86      | 97  | 2 | 10 | 11.3              | 91.5  | 17  | 0  | 18                     | 1  |  |  |
| 87      | 97  | 2 | 9  | 8.4               | 92    | 23  | 0  | 24                     | 2  |  |  |
| 87      | 130 | 5 | 42 | 7.4               | 108.5 | 46  | 0  | 47                     | 2  |  |  |
| 98      | 130 | 4 | 31 | 5.2               | 114   | 61  | 1  | 62                     | 1  |  |  |
| 147     | 152 | 1 | 4  | 10.3              | 149.5 | 78  | 2  | 78                     | 1  |  |  |
| 153     | 163 | 2 | 9  | 6.6               | 158   | 83  | 1  | 83                     | 2  |  |  |
| 153     | 168 | 2 | 14 | 12.7              | 160.5 | 69  | 2  | 69                     | 1  |  |  |
| 172     | 179 | 1 | 6  | 10.9              | 175.5 | 20  | 1  | 22                     | 2  |  |  |
| 176     | 187 | 2 | 9  | 14.1              | 181.5 | 6   | 0  | 7                      | 1  |  |  |
| 188     | 193 | 2 | 4  | 10.9              | 190.5 | 3   | 0  | 4                      | 1  |  |  |
| 188     | 200 | 2 | 11 | 10.0              | 194   | 2   | 0  | 3                      | 1  |  |  |
| 188     | 210 | 4 | 21 | 12.5              | 199   | 2   | 0  | 3                      | 0  |  |  |
| 189     | 201 | 3 | 11 | 10.0              | 195   | 2   | 0  | 3                      | 0  |  |  |
| 190     | 210 | 3 | 19 | 10.8              | 200   | 2   | 0  | 2                      | 0  |  |  |
| 194     | 210 | 3 | 15 | 10.2              | 202   | 2   | 0  | 3                      | 0  |  |  |
| 201     | 210 | 2 | 8  | 9.3               | 205.5 | 2   | 0  | 3                      | 0  |  |  |
| 211     | 247 | 5 | 35 | 7.8               | 229   | 45  | 1  | 45                     | 2  |  |  |
| 211     | 247 | 6 | 35 | 7.8               | 229   | 45  | 1  | 45                     | 2  |  |  |
| 211     | 251 | 6 | 39 | 10.7              | 231   | 37  | 1  | 36                     | 2  |  |  |
| 215     | 247 | 6 | 31 | 7.7               | 231   | 46  | 1  | 46                     | 2  |  |  |
| 266     | 278 | 3 | 11 | 6.9               | 272   | 9   | 1  | 9                      | 1  |  |  |
| 266     | 280 | 4 | 13 | 7.9               | 273   | 8   | 0  | 7                      | 1  |  |  |
| 266     | 288 | 3 | 21 | 9.0               | 277   | 10  | 1  | 11                     | 1  |  |  |
| 289     | 293 | 1 | 3  | 7.0               | 291   | 21  | 0  | 21                     | 1  |  |  |
| 289     | 296 | 2 | 6  | 13.9              | 292.5 | 22  | 1  | 21                     | 1  |  |  |
| 297     | 305 | 2 | 7  | 11.6              | 301   | 46  | 1  | 48                     | 1  |  |  |
| 297     | 311 | 2 | 13 | 12.2              | 304   | 4   | 0  | 4                      | 0  |  |  |
| 312     | 327 | 3 | 14 | 13.6              | 319.5 | 17  | 0  | 18                     | 1  |  |  |
| 315     | 326 | 2 | 10 | 10.3              | 320.5 | 23  | 0  | 23                     | 1  |  |  |
| 315     | 327 | 3 | 11 | 13.0              | 321   | 19  | 1  | 19                     | 1  |  |  |
| 318     | 327 | 2 | 8  | 12.8              | 322.5 | 25  | 1  | 27                     | 1  |  |  |
| 327     | 340 | 2 | 11 | 11.1              | 333.5 | 15  | 0  | 18                     | 0  |  |  |
| 328     | 357 | 4 | 25 | 13.5              | 342.5 | 13  | 0  | 14                     | 1  |  |  |
| 328     | 360 | 4 | 28 | 14.7              | 344   | 12  | 0  | 13                     | 1  |  |  |
| 341     | 360 | 3 | 16 | 14.5              | 350.5 | 16  | 1  | 16                     | 1  |  |  |
| 358     | 363 | 1 | 4  | 10.5              | 360.5 | 2   | 1  | 3                      | 2  |  |  |
| 366     | 378 | 2 | 11 | 11.9              | 372   | 21  | 0  | 22                     | 1  |  |  |
| 366     | 378 | 3 | 11 | 11.9              | 372   | 22  | 0  | 21                     | 0  |  |  |
| 367     | 378 | 3 | 10 | 10.8              | 372.5 | 24  | 0  | 23                     | 1  |  |  |
| 367     | 380 | 2 | 12 | 10.8              | 373.5 | 32  | 0  | 32                     | 1  |  |  |
| 368     | 378 | 2 | 9  | 10.2              | 373   | 26  | 0  | 26                     | 1  |  |  |
| 369     | 378 | 2 | 8  | 10.8              | 373.5 | 27  | 0  | 27                     | 1  |  |  |
| 385     | 389 | 1 | 3  | 13.9              | 387   | 16  | 0  | 18                     | 1  |  |  |
| 390     | 401 | 2 | 10 | 4.6               | 395.5 | 47  | 0  | 47                     | 1  |  |  |
| 390     | 413 | 3 | 21 | 8.8               | 401.5 | 51  | 0  | 52                     | 2  |  |  |
| 390     | 413 | 4 | 21 | 8.8               | 401.5 | 51  | 0  | 51                     | 2  |  |  |
| 414     | 419 | 1 | 3  | 14.0              | 416.5 | 2   | 1  | 3                      | 0  |  |  |
| 414     | 423 | 2 | 7  | 13.6              | 418.5 | 19  | 0  | 22                     | 1  |  |  |
| 425     | 444 | 4 | 18 | 10.6              | 434.5 | 30  | 1  | 30                     | 2  |  |  |
| 427     | 441 | 4 | 13 | 7.9               | 434   | 7   | 1  | 7                      | 0  |  |  |
| 427     | 443 | 4 | 15 | 7.4               | 435   | 23  | 1  | 23                     | 0  |  |  |
| 445     | 449 | 1 | 3  | 8.0               | 447   | 1   | 1  | 1                      | 1  |  |  |
| 450     | 456 | 1 | 5  | 5.9               | 453   | 30  | 0  | 29                     | 1  |  |  |
| 450     | 456 | 2 | 5  | 6.0               | 453   | 30  | 1  | 29                     | 1  |  |  |
| 451     | 456 | 1 | 4  | 5.9               | 453.5 | 35  | 1  | 33                     | 1  |  |  |
| 451     | 457 | 2 | 5  | 6.0               | 454   | 30  | 1  | 29                     | 1  |  |  |
| 487     | 502 | 3 | 13 | 13.7              | 494.5 | 24  | 1  | 25                     | 2  |  |  |
| 491     | 502 | 2 | 10 | 8.1               | 496.5 | 31  | 1  | 31                     | 1  |  |  |
| 491     | 502 | 3 | 10 | 10.0              | 496.5 | 27  | 0  | 27                     | 1  |  |  |
| 491     | 503 | 2 | 11 | 9.3               | 497   | 29  | 1  | 30                     | 1  |  |  |
| 503     | 513 | 2 | 8  | 7.4               | 508   | 26  | 0  | 27                     | 0  |  |  |
| 504     | 513 | 2 | 7  | 7.2               | 508.5 | 29  | 0  | 30                     | 1  |  |  |
| 514     | 521 | 2 | 6  | 12.9              | 517.5 | 2   | 0  | 3                      | 0  |  |  |
| 522     | 531 | 2 | 8  | 14.9              | 526.5 | 1   | 0  | 1                      | 0  |  |  |
| 522     | 532 | 2 | 9  | 17.1              | 527   | 1   | 0  | 1                      | 0  |  |  |
| 532     | 536 | 1 | 3  | 9.6               | 534   | 53  | 1  | 55                     | 2  |  |  |

**Table S4.** Relative percentage of global deuteration level of Vps34 (A), Vps38 (B), Vps15 (C), and Vps30 (D) in presence and in absence of nanobody 8780. Peptides showing decreased HDX on nanobody binding (in red) suggest a binding epitope. Column labels as in Table S2.

| ID     | Construct                                               | Backbone | Use                                                                                                                            |
|--------|---------------------------------------------------------|----------|--------------------------------------------------------------------------------------------------------------------------------|
| pRS426 | empty                                                   |          | Pull down assay, transformed with pYO225                                                                                       |
| pYO69  | ScVPS34                                                 | pRS424   | Vps34/Vps15 heterodimer coexpression for HDX-MS, pull-down, GUV, and kinase assays, transformed with pYO225                    |
| pYO225 | ScVPS15-3xTEV-ZZ-ADH1t                                  | pRS426   | Vps34/Vps15 heterodimer coexpression for HDX-MS, pull-down, GUV, and kinase assays, transformed with pYO069, pYO290, or pYO361 |
| pYO290 | ScVPS34 D731N                                           | pRS424   | Vps34/Vps15 heterodimer coexpression for kinase assay, transformed with pYO225                                                 |
| pYO361 | Scvps34 HELCAT ( $\Delta$ 267)                          | pRS424   | Vps34/Vps15 heterodimer coexpression for pull-down, transformed with pYO225                                                    |
| pYO227 | ZZ-3xTEV-ScVPS30                                        | pRS426   | Vps30 single expression for HDX-MS                                                                                             |
| pYO359 | ScVPS34+ScVPS15-3xTEV-ZZ-ADH1t                          | pRS424   | Complex II crystallization, transformed with pYO539                                                                            |
| pYO379 | ZZ-3xTEV-ScVPS30+ScVPS34+ScVPS15-3xTEV-ZZ-ADH1t         | pRS426   | Complex I expression for GUV and kinase assays, transformed with pYO411                                                        |
| pYO391 | ScVPS38+ZZ-3xTEV-ScVPS30+ScVPS34+ScVPS15-3xTEV-ZZ-ADH1t | pRS426   | Complex II expression for HDX-MS, MALLS, and crystallization                                                                   |
| pYO411 | 3xTEV-ScATG14                                           | pRS424   | Complex I expression for GUV and kinase assays, transformed with pYO379                                                        |
| pYO539 | ScVPS30+ScVPS38                                         | pRS426   | Complex II crystallization, transformed with pYO359                                                                            |
| pYO734 | ScVPS30+ZZ-3xTEV-ScVPS38                                | pRS426   | In vitro reconstitution                                                                                                        |
| pYO831 | ZZ-3xTEV-Scvps38 (1-212F)                               | pRS424   | Vps38 C2 domain/Vps30 NTD coexpression for MALLS, transformed with pYO832                                                      |
| pYO832 | Scvps30 (1-215E )                                       | pRS426   | Vps38 C2 domain/Vps30 NTD coexpression for MALLS, transformed with pYO831                                                      |
| pYO979 | ScVPS38+Scvps30 (FRK to DDD at 430-432)                 | pRS426   | Complex II with "aromatic finger" mutant vps30 expression for GUV and kinase assays, transformed with pYO359                   |
| pRS416 | empty                                                   |          | Cell biology                                                                                                                   |
| pYO478 | pVPS34-ScVPS34 FL (1-899)-3xFLAG-ADH1t                  | pRS416   | Cell biology                                                                                                                   |
| pYO759 | pVPS38-ScVPS38 FL (1-440)-3xFLAG-ADH1t                  | pRS416   | Cell biology                                                                                                                   |
| pYO760 | pVPS38-Scvps38 $\Delta$ C2 (155-440)-3xFLAG-ADH1t       | pRS416   | Cell biology                                                                                                                   |
| pYO761 | pVPS38-Scvps38 $\Delta$ BARA2 (1-319)-3xFLAG-ADH1t      | pRS416   | Cell biology                                                                                                                   |
| pYO764 | pVPS38-ScVPS38 FL (1-440)-EGFP-ADH1t                    | pRS416   | Cell biology                                                                                                                   |
| pYO765 | pVPS38-Scvps38 $\Delta$ C2 (155-440)-EGFP-ADH1t         | pRS416   | Cell biology                                                                                                                   |
| pYO766 | pVPS38-Scvps38 $\Delta$ BARA2 (1-319)-EGFP-ADH1t        | pRS416   | Cell biology                                                                                                                   |
| pYO932 | pVPS34-Scvps34 HELCAT ( $\Delta$ 267)-3xFLAG-ADH1t      | pRS416   | Cell biology                                                                                                                   |
| pYO933 | pVPS34-Scvps34 $\Delta$ C2HH (154-202)-3xFLAG-ADH1t     | pRS416   | Cell biology                                                                                                                   |
| pYO934 | pVPS34-Scvps34 $\Delta$ CBR1(31-55)-3xFLAG-ADH1t        | pRS416   | Cell biology                                                                                                                   |
| CA8780 | nanobody against complex II                             | pMESy4   | HDX-MS mapping and crystallization with complexII                                                                              |

**Table S5.** Plasmid list. All protein expression plasmids are under the GAL1 promoter (Somatogen Inc.) and the MF (ALPHA)1 terminator, unless noted otherwise. pVPS38: VPS38 promoter from -934 bp to -1 bp. pVPS34: VPS34 promoter from -214 to -1 bp. ADH1t: ADH1 terminator. Nanobody expression plasmid is C-terminally tagged with 6xHIS and the CaptureSelect C-terminal EPEA tag.

| ID            | Genotype                                                                                     | Source          |
|---------------|----------------------------------------------------------------------------------------------|-----------------|
| BCY123        | <i>Mata pep4::HIS3 prb::LEU2 bar1:HISG lys2::GAL1/10-GAL4 can1 ade2 ura3 leu2-3,112 trp1</i> | (64)            |
| YOY193        | BCY123 <i>TRX1-ADE2::ade2Δ</i>                                                               | This study      |
| BY4741        | <i>Mata his3Δ1 leu2Δ0 met15Δ0 ura3Δ0</i>                                                     | Open Biosystems |
| <i>vps38Δ</i> | BY4741 <i>vps38Δ::KnamMX</i>                                                                 | Open Biosystems |
| SEY6210       | <i>MATa leu2-3,112 ura3-52 his3-Δ200 trp1-Δ901 suc2-Δ9 lys2-801; GAL</i>                     | (65)            |
| <i>vps34Δ</i> | SEY6210 <i>vps34Δ::HIS5</i>                                                                  | This study      |

**Table S6.** Yeast strains used in this study.

**Movie S1.** Movie depicting the first non-trivial normal mode of complex II, as computed using the Bio3D Package (66).
